# Supplementary material for: Genome-wide identification and expression analysis of the GRAS transcription factor family and its expression profiles in Elymus sibiricus
Source: Research Square preprint supplement (doi:10.21203/rs.3.rs-7355432/v1), 2025-10-08
Supplement: Supplementary file 1 [file 4f75135a2a0ba37aacc9085f.xlsx]

## Sheet: Supplementary table 1
Classification of promoter cis-elements
	ARE	GC-motif	LTR	MBS	TC-rich	ABRE	CGTCA-motif	GARE-motif	P-box	TCA	TGACG-motif	CAT-box	Ciradian	GCN4-motif	O2-site	RY-element	Box-4	GATA-motif	G-box	GT1-motif	MRE	Spl
EsGRAS64	1	1	0	0	0	3	7	0	2	1	7	2	0	0	1	0	0	0	4	1	0	3
EsGRAS70	0	3	0	0	0	6	5	0	0	0	5	0	0	0	0	0	2	0	6	0	0	0
EsGRAS103	0	0	0	1	0	9	2	0	0	0	2	2	0	0	0	0	1	0	0	0	0	4
EsGRAS126	1	0	2	1	0	1	5	1	0	2	5	2	0	0	0	0	0	0	1	0	0	1
EsGRAS104	0	2	0	0	0	5	3	0	0	3	3	2	0	0	0	0	1	0	2	0	1	4
EsGRAS125	0	0	0	0	0	0	1	0	0	4	1	5	1	0	0	1	0	2	0	0	0	0
EsGRAS105	1	0	1	1	0	3	0	0	0	1	0	0	0	0	0	0	0	0	3	0	0	6
EsGRAS124	0	0	1	1	0	3	2	2	0	0	2	0	0	0	0	0	1	0	2	0	0	0
EsGRAS109	1	0	0	0	0	2	2	0	2	1	2	4	0	0	1	0	0	0	1	2	0	3
EsGRAS120	1	0	0	1	1	5	3	0	2	1	3	4	0	0	1	0	0	0	2	2	0	1
EsGRAS129	0	0	0	0	0	4	0	0	0	2	0	3	1	0	0	0	0	0	3	2	1	2
EsGRAS111	1	0	0	3	0	0	1	0	0	0	1	3	1	0	3	0	0	0	1	1	1	0
EsGRAS118	1	0	0	2	0	0	1	1	0	1	1	3	0	0	3	0	0	0	1	1	1	0
EsGRAS82	1	0	0	0	0	3	4	0	1	0	4	0	0	0	1	0	1	0	6	1	0	0
EsGRAS110	3	2	1	3	0	3	4	0	1	1	4	0	0	0	0	0	1	1	2	1	0	0
EsGRAS119	1	0	0	2	1	4	0	2	0	1	0	0	0	0	0	0	1	0	4	0	0	0
EsGRAS108	2	1	0	1	0	1	1	0	1	3	1	1	1	0	2	0	1	2	2	0	0	0
EsGRAS121	1	2	0	2	0	0	1	0	0	2	1	0	1	0	2	0	2	1	0	3	0	0
EsGRAS107	0	0	1	3	1	6	1	1	1	0	1	1	0	1	1	0	0	0	3	3	1	0
EsGRAS122	0	0	0	3	0	1	0	0	1	2	0	2	1	0	2	0	0	1	3	1	1	1
EsGRAS106	5	1	0	2	0	0	1	0	1	1	1	1	0	0	0	0	0	1	0	1	0	0
EsGRAS123	4	0	0	2	0	1	2	0	1	2	2	1	0	0	0	0	0	1	2	1	0	0
EsGRAS73	4	2	0	0	1	0	2	1	0	0	2	0	1	0	2	0	1	1	0	2	1	0
EsGRAS83	3	2	0	2	0	4	0	1	0	0	0	0	0	0	0	0	2	1	3	5	1	1
EsGRAS49	3	0	0	1	1	12	3	0	0	1	3	0	0	0	0	0	2	1	6	3	0	6
EsGRAS55	1	2	3	0	2	5	3	1	0	1	3	1	1	1	1	0	3	0	4	0	0	1
EsGRAS75	1	1	3	0	0	4	3	0	1	1	3	0	0	0	0	0	2	1	3	0	3	3
EsGRAS85	0	1	3	0	0	2	4	0	2	2	4	0	0	0	0	0	0	1	3	0	0	2
EsGRAS81	1	0	0	0	1	9	1	0	0	1	1	2	0	0	0	0	0	1	7	1	0	2
EsGRAS90	0	1	0	0	0	10	0	0	1	0	0	4	0	0	0	0	0	0	11	2	0	2
EsGRAS43	3	0	1	3	0	3	4	0	1	0	4	0	0	0	0	0	2	1	3	0	0	0
EsGRAS56	2	0	1	3	0	6	2	0	1	1	2	1	0	0	0	0	5	0	6	2	0	0
EsGRAS44	5	0	1	2	0	8	3	1	2	2	3	0	0	0	2	2	2	1	9	0	0	0
EsGRAS57	0	2	4	2	0	6	2	0	1	2	2	1	0	0	0	0	5	0	5	0	0	0
EsGRAS58	1	2	3	4	0	22	4	0	2	0	4	2	0	0	0	1	2	1	13	2	0	2
EsGRAS26	0	1	1	1	0	21	5	0	0	0	5	0	0	0	2	0	0	2	7	0	0	0
EsGRAS35	1	0	0	2	0	0	1	0	0	2	1	0	0	0	2	0	0	0	1	0	0	0
EsGRAS25	1	0	2	1	0	4	2	0	0	0	2	0	0	0	1	0	1	0	3	3	0	0
EsGRAS36	1	1	0	1	1	6	1	0	0	4	1	0	0	0	0	0	4	0	4	6	0	0
EsGRAS27	2	0	0	0	1	0	1	0	0	1	1	2	0	0	0	0	0	1	0	1	2	1
EsGRAS37	4	1	1	1	0	0	2	0	0	1	2	2	0	0	0	0	1	0	1	1	0	0
EsGRAS97	0	0	0	2	0	6	3	0	1	1	3	1	0	0	0	0	0	0	4	0	0	1
EsGRAS8	1	0	0	0	0	4	3	0	0	0	3	4	0	0	0	0	0	0	3	0	0	0
EsGRAS19	1	1	0	0	0	1	0	0	0	0	0	0	0	0	0	0	3	0	1	0	0	0
EsGRAS1	3	0	0	1	0	4	3	0	0	0	3	0	0	0	1	1	1	0	4	0	1	0
EsGRAS12	3	2	2	1	0	9	1	0	0	0	1	1	0	0	1	2	1	0	6	0	0	0
EsGRAS31	1	0	0	0	0	20	4	0	0	1	4	1	0	0	0	0	0	0	2	1	0	1
EsGRAS40	2	0	1	0	1	10	3	0	1	0	3	0	0	0	0	0	0	0	7	1	0	0
EsGRAS22	0	1	0	0	0	9	1	0	0	1	1	1	0	0	0	0	11	2	7	0	0	0
EsGRAS23	0	1	0	0	0	10	1	0	0	1	1	1	0	0	0	0	11	2	8	0	0	0
EsGRAS24	0	4	1	2	0	6	5	0	0	0	5	1	0	0	2	0	0	1	1	0	0	0
EsGRAS10	2	0	0	0	1	12	3	0	0	1	3	1	0	0	0	0	10	1	11	0	1	0
EsGRAS9	1	0	1	1	0	7	4	0	0	2	4	1	1	1	0	0	13	1	5	0	0	0
EsGRAS20	1	0	1	0	0	12	0	0	0	1	0	0	0	1	2	0	1	1	10	1	0	1
EsGRAS21	1	0	1	0	0	12	0	0	0	1	0	0	0	1	2	0	1	1	10	1	0	1
EsGRAS17	0	5	0	0	0	11	4	1	0	1	4	2	0	0	0	0	1	0	9	3	0	4
EsGRAS45	1	0	3	0	0	0	2	0	0	3	2	1	0	0	0	3	0	0	0	0	0	3
EsGRAS51	1	0	0	0	0	22	4	0	1	1	4	0	0	0	0	1	0	0	10	1	0	1
EsGRAS74	3	0	0	1	0	6	1	2	0	1	1	1	0	0	2	0	0	1	5	0	0	3
EsGRAS84	1	0	1	1	0	3	2	1	0	0	2	0	0	3	0	0	0	1	2	0	0	0
EsGRAS102	0	0	2	0	0	6	3	0	1	0	3	2	0	0	1	1	0	1	6	2	0	3
EsGRAS117	1	1	2	2	0	1	5	0	0	1	5	1	0	0	2	0	0	1	4	1	0	0
EsGRAS11	1	0	2	2	0	11	0	1	0	0	0	1	0	0	0	0	2	0	9	3	0	0
EsGRAS47	5	0	1	1	1	5	6	0	0	0	6	0	0	0	0	0	1	0	3	0	2	0
EsGRAS53	1	1	0	1	0	2	0	0	2	1	0	1	0	0	1	0	2	0	1	1	0	0
EsGRAS48	2	1	0	1	0	7	2	1	2	0	2	0	0	0	0	0	0	1	6	1	0	2
EsGRAS54	4	1	0	1	0	7	2	0	1	1	2	0	0	0	0	0	1	0	3	1	1	1
EsGRAS63	1	0	0	0	2	8	3	0	0	3	3	1	0	0	0	0	0	2	9	0	0	2
EsGRAS69	0	1	1	0	1	8	4	0	0	3	4	3	0	0	0	0	0	1	6	0	0	0
EsGRAS76	4	0	1	2	0	2	2	0	0	0	2	1	0	0	0	0	0	0	3	0	0	1
EsGRAS86	1	0	0	1	1	8	2	0	1	0	2	1	0	0	0	0	0	0	4	1	0	3
EsGRAS101	0	0	1	0	0	2	0	0	0	1	0	0	0	0	0	0	0	0	2	0	0	0
EsGRAS116	2	0	1	0	1	0	1	0	0	5	1	0	0	0	0	0	1	0	1	0	0	0
EsGRAS4	1	3	3	1	0	6	3	0	0	1	3	3	0	0	3	0	0	1	7	1	0	5
EsGRAS15	0	2	1	0	1	5	3	0	0	0	3	3	0	0	1	0	0	0	4	3	1	6
EsGRAS30	2	0	3	1	1	7	3	0	0	0	3	0	0	0	0	1	1	0	4	0	0	0
EsGRAS39	3	0	4	1	1	16	3	0	0	0	3	0	0	0	0	2	1	0	8	0	0	0
EsGRAS34	3	3	2	0	1	3	2	0	0	0	2	1	0	1	0	0	5	1	3	2	0	3
EsGRAS41	4	5	2	0	0	11	7	0	0	0	7	2	0	0	0	0	4	0	5	0	0	3
EsGRAS33	5	0	0	0	0	2	1	2	0	0	1	0	0	0	2	0	2	0	2	4	1	0
EsGRAS32	1	0	0	1	0	5	1	0	0	1	1	3	1	0	1	0	7	0	3	2	0	1
EsGRAS42	1	0	0	2	0	11	6	0	0	0	6	1	0	1	2	0	1	2	11	1	0	2
EsGRAS113	1	1	3	0	1	5	1	0	0	4	1	1	0	0	1	1	1	0	4	0	0	1
EsGRAS80	1	0	1	1	0	4	4	0	0	0	4	0	0	0	1	0	0	0	4	5	0	0
EsGRAS98	0	1	3	1	0	4	4	1	1	1	4	1	0	0	1	0	0	2	6	0	0	6
EsGRAS94	0	2	0	16	0	7	1	0	0	0	1	1	0	0	0	0	0	1	8	0	0	1
EsGRAS127	3	0	0	2	0	4	4	0	0	2	4	2	0	1	1	0	2	0	4	0	0	2
EsGRAS100	2	0	0	2	0	11	2	0	0	0	2	1	0	0	0	0	3	0	3	1	0	1
EsGRAS115	3	0	0	2	0	3	2	0	0	0	2	1	0	0	1	0	3	0	1	0	0	0
EsGRAS99	1	0	1	0	0	7	6	0	0	0	6	1	0	0	1	0	2	0	10	0	1	4
EsGRAS114	1	3	2	3	0	8	5	0	1	1	5	1	1	2	0	0	1	1	6	0	1	3
EsGRAS65	3	2	1	0	0	2	1	0	0	0	1	0	0	0	2	0	0	0	3	0	0	0
EsGRAS71	2	1	1	0	0	3	1	0	0	0	1	0	0	0	0	0	0	1	3	0	0	0
EsGRAS92	1	0	0	0	3	8	3	0	0	3	3	0	0	0	0	0	0	0	5	0	0	1
EsGRAS93	0	1	1	0	0	2	2	0	0	2	2	4	0	0	2	0	0	1	3	0	0	1
EsGRAS2	3	1	2	0	0	13	0	0	2	0	0	2	0	0	1	0	0	0	6	0	0	0
EsGRAS13	2	1	2	0	0	11	3	1	1	1	3	2	0	0	0	0	0	1	5	0	0	0
EsGRAS46	3	1	2	0	2	2	1	1	1	0	1	0	0	0	0	0	0	1	4	0	0	3
EsGRAS52	1	0	2	1	0	8	0	0	0	0	0	4	0	0	0	0	1	1	7	0	1	3
EsGRAS77	3	0	0	0	0	4	3	0	0	2	3	0	0	0	1	0	1	0	4	1	0	0
EsGRAS87	0	1	0	2	0	6	3	0	0	0	3	6	0	0	1	0	0	1	7	0	0	5
EsGRAS66	1	1	3	2	4	1	0	0	0	2	0	1	0	0	2	1	1	0	0	1	0	0
EsGRAS78	0	1	0	1	0	2	4	1	0	0	4	0	0	0	1	0	0	0	3	0	0	1
EsGRAS88	0	1	3	0	1	11	7	0	0	0	7	1	0	0	0	0	0	0	11	0	0	7
EsGRAS67	2	2	3	0	0	0	1	0	0	0	1	2	0	0	3	0	0	1	0	0	0	1
EsGRAS3	2	1	0	1	0	3	6	0	1	1	6	0	0	0	1	0	1	1	6	0	0	3
EsGRAS14	2	0	0	0	0	3	7	1	0	0	7	0	0	0	1	0	1	0	5	0	0	4
EsGRAS5	4	1	0	0	0	1	1	0	0	0	1	1	0	1	1	0	2	1	2	0	1	1
EsGRAS16	0	0	0	0	0	3	1	0	0	0	1	0	0	1	1	0	2	0	1	0	0	1
EsGRAS50	0	0	0	0	0	13	2	0	0	1	2	1	0	0	0	0	3	0	10	0	0	1
EsGRAS72	1	1	2	0	0	1	0	0	1	3	0	1	0	0	0	0	0	1	1	0	0	1
EsGRAS95	0	1	0	1	0	7	2	0	0	1	2	0	1	0	1	0	1	0	4	2	0	0
EsGRAS128	0	1	0	2	0	2	2	0	0	2	0	0	0	0	1	0	2	0	3	3	0	0
EsGRAS59	2	0	1	1	0	2	4	0	0	2	4	2	0	0	1	0	0	0	2	1	2	1
EsGRAS60	3	0	0	2	0	0	1	0	0	3	1	3	0	0	1	0	0	0	1	1	2	1
EsGRAS61	3	0	0	2	0	0	0	0	1	2	0	1	0	1	0	0	2	0	0	0	0	0
EsGRAS79	1	2	0	1	1	0	0	1	0	2	0	2	0	0	0	0	1	0	1	0	1	3
EsGRAS89	2	2	1	2	1	0	3	0	0	4	3	2	0	0	0	0	2	0	0	0	1	2
EsGRAS62	0	0	2	0	0	13	2	0	0	1	2	1	0	0	1	0	1	0	7	1	0	0
EsGRAS68	1	1	0	0	0	5	3	0	0	2	3	1	0	0	1	0	1	2	2	1	0	0
EsGRAS91	2	2	2	0	1	3	4	0	2	2	4	2	0	1	0	1	0	0	3	1	0	1
EsGRAS112	0	2	2	1	0	3	11	2	0	2	11	2	0	0	0	1	0	1	3	1	1	1
EsGRAS96	0	3	2	0	1	8	4	0	2	1	4	0	0	1	3	0	0	0	6	0	1	2
EsGRAS130	0	1	0	0	0	5	5	0	0	0	5	1	0	0	0	0	1	0	6	0	0	1
EsGRAS28	3	0	1	2	0	0	2	1	1	0	2	1	0	0	0	1	1	0	1	1	0	0
EsGRAS29	5	2	1	0	0	2	2	0	0	0	2	0	0	0	0	1	1	2	1	1	0	0
EsGRAS38	0	0	1	2	0	7	3	0	1	1	3	3	1	0	0	0	1	1	5	1	0	1
EsGRAS7	0	1	0	0	0	6	0	0	0	0	0	3	0	0	0	0	0	0	10	0	0	3
EsGRAS6	4	1	1	0	0	19	2	0	0	1	2	1	0	0	0	0	0	0	14	0	0	0
EsGRAS18	1	2	2	0	2	12	2	0	1	0	2	0	0	0	0	0	0	0	10	1	0	2

## Sheet: Supplementary table 2
Organization of promoter cis-elements
	Environmental stress-related elements	Hormone responsive elements	Development related elements	Light responsive elements
EsGRAS64	2	20	3	8
EsGRAS70	3	16	0	8
EsGRAS103	1	13	2	5
EsGRAS126	4	14	2	2
EsGRAS104	2	14	2	8
EsGRAS125	0	6	7	2
EsGRAS105	3	4	0	9
EsGRAS124	2	9	0	3
EsGRAS109	1	9	5	6
EsGRAS120	3	14	5	5
EsGRAS129	0	6	4	8
EsGRAS111	4	2	7	3
EsGRAS118	3	4	6	3
EsGRAS82	1	12	1	8
EsGRAS110	9	13	0	5
EsGRAS119	4	7	0	5
EsGRAS108	4	7	4	5
EsGRAS121	5	4	3	6
EsGRAS107	5	10	3	7
EsGRAS122	3	4	5	7
EsGRAS106	8	4	1	2
EsGRAS123	6	8	1	4
EsGRAS73	7	5	3	5
EsGRAS83	7	5	0	13
EsGRAS49	5	19	0	18
EsGRAS55	8	13	4	8
EsGRAS75	5	12	0	12
EsGRAS85	4	14	0	6
EsGRAS81	2	12	2	11
EsGRAS90	1	11	4	15
EsGRAS43	7	12	0	6
EsGRAS56	6	12	1	13
EsGRAS44	8	19	4	12
EsGRAS57	8	13	1	10
EsGRAS58	10	32	3	20
EsGRAS26	3	31	2	9
EsGRAS35	3	4	2	1
EsGRAS25	4	8	1	7
EsGRAS36	4	12	0	14
EsGRAS27	3	3	2	5
EsGRAS37	7	5	2	3
EsGRAS97	2	14	1	5
EsGRAS8	1	10	4	3
EsGRAS19	2	1	0	4
EsGRAS1	4	10	2	6
EsGRAS12	8	11	4	7
EsGRAS31	1	29	1	4
EsGRAS40	4	17	0	8
EsGRAS22	1	12	1	20
EsGRAS23	1	13	1	21
EsGRAS24	7	16	3	2
EsGRAS10	3	19	1	23
EsGRAS9	3	17	3	19
EsGRAS20	2	13	3	14
EsGRAS21	2	13	3	14
EsGRAS17	5	21	2	17
EsGRAS45	4	7	4	3
EsGRAS51	1	32	1	12
EsGRAS74	4	11	3	9
EsGRAS84	3	8	3	3
EsGRAS102	2	13	4	12
EsGRAS117	6	12	3	6
EsGRAS11	5	12	1	14
EsGRAS47	8	17	0	6
EsGRAS53	3	5	2	4
EsGRAS48	4	14	0	10
EsGRAS54	6	13	0	7
EsGRAS63	3	17	1	13
EsGRAS69	3	19	3	7
EsGRAS76	7	6	1	4
EsGRAS86	3	13	1	8
EsGRAS101	1	3	0	2
EsGRAS116	4	7	0	2
EsGRAS4	8	13	6	14
EsGRAS15	4	11	4	14
EsGRAS30	7	13	1	5
EsGRAS39	9	22	2	9
EsGRAS34	9	7	2	14
EsGRAS41	11	25	2	12
EsGRAS33	5	6	2	9
EsGRAS32	2	8	5	13
EsGRAS42	3	23	4	17
EsGRAS113	6	11	3	6
EsGRAS80	3	12	1	9
EsGRAS98	5	15	2	14
EsGRAS94	18	9	1	10
EsGRAS127	5	14	4	8
EsGRAS100	4	15	1	8
EsGRAS115	5	7	2	4
EsGRAS99	2	19	2	17
EsGRAS114	9	20	4	12
EsGRAS65	6	4	2	3
EsGRAS71	4	5	0	4
EsGRAS92	4	17	0	6
EsGRAS93	2	8	6	5
EsGRAS2	6	15	3	6
EsGRAS13	5	20	2	6
EsGRAS46	8	6	0	8
EsGRAS52	4	8	4	13
EsGRAS77	3	12	1	6
EsGRAS87	3	12	7	13
EsGRAS66	11	3	4	2
EsGRAS78	2	11	1	4
EsGRAS88	5	25	1	18
EsGRAS67	7	2	5	2
EsGRAS3	4	17	1	11
EsGRAS14	2	18	1	10
EsGRAS5	5	3	3	7
EsGRAS16	0	5	2	4
EsGRAS50	0	18	1	14
EsGRAS72	4	5	1	3
EsGRAS95	2	12	2	7
EsGRAS128	3	6	1	8
EsGRAS59	4	12	3	6
EsGRAS60	5	5	4	5
EsGRAS61	5	3	2	2
EsGRAS79	5	3	2	6
EsGRAS89	8	10	2	5
EsGRAS62	2	18	2	9
EsGRAS68	2	13	2	6
EsGRAS91	7	15	4	5
EsGRAS112	5	29	3	7
EsGRAS96	6	19	4	9
EsGRAS130	1	15	1	8
EsGRAS28	6	6	2	3
EsGRAS29	8	6	1	5
EsGRAS38	3	15	4	9
EsGRAS7	1	6	3	13
EsGRAS6	6	24	1	14
EsGRAS18	7	17	0	13

## Sheet: Supplementary table 3
Primer design for GRAS gene family
EsGRAS1*F	CTCCAAGATCTCCCTGGGGA
EsGRAS1*R	CCTCGTAGGACATGTCGAGC
EsGRAS10*F	TCTGGGAAACGGACTGAACG
EsGRAS10*R	CAAACAGGCGGAGTAGCAGA
EsGRAS100*F	GAGTTCGCGGACTCCTTGAA
EsGRAS100*R	CTTCCAGCACAACACAAGCC
EsGRAS101*F	TCAGCCCCTTCGTCAAGTTC
EsGRAS101*R	GCCGAGTAGTAGTGGATGGC
EsGRAS102*F	CAAGACTGACCGCAGCCTTA
EsGRAS102*R	AGGCGATGCATCTGTAGAGC
EsGRAS103*F	GAGAAGAGCACCTCGATCGG
EsGRAS103*R	CACATTAGGCCGCATCTTGC
EsGRAS104*F	CCATTGAGCTGCTGAAGGGA
EsGRAS104*R	CAGTCTCCCTCTTTGCTGGG
EsGRAS105*F	CGACCAGGACATGCTCAACT
EsGRAS105*R	CGCCTCGGCAAAATAATGGG
EsGRAS106*F	ATCACCTGGCACTCCCCTAT
EsGRAS106*R	GCCTTGCTCTTTCTCCCCTT
EsGRAS107*F	TTTGCATCGAGGACCTGGAC
EsGRAS107*R	ACCATCTGCCTCCCATGTTG
EsGRAS108*F	CGTGGAAGGGAAGAGCAAGT
EsGRAS108*R	TCAAGCATGTCGAACACCGA
EsGRAS109*F	TACAAGGCCATTGCAGGGAG
EsGRAS109*R	ATCGAACAAGGCCGTGAAGT
EsGRAS11*F	CAACAACAGCACCAGCCATC
EsGRAS11*R	TTACTGACCCCAGCATGCTG
EsGRAS110*F	CAGTTTGGCGTGCCATTCAA
EsGRAS110*R	CAGAAGCCACCGTTGATCCT
EsGRAS111*F	TACATCTCGCGCATGCTCAT
EsGRAS111*R	TTGGTGGAGATGCTCTGCTG
EsGRAS112*F	TTGAACTGGATCATGGGGGC
EsGRAS112*R	GGGTGAGGTAGAGGTCGTCT
EsGRAS113*F	TTCTACGAGTCGTGCCCCTA
EsGRAS113*R	AGTTGTGGTTAGCCTCCTGC
EsGRAS114*F	GCTCTGCTACAAGACGCTCA
EsGRAS114*R	AGACTGACCTCGTACTCCCC
EsGRAS115*F	GAGTTCGCGGACTCCTTGAA
EsGRAS115*R	CTTCCAGCACAACACAAGCC
EsGRAS116*F	TCAGCCCCTTCGTCAAGTTC
EsGRAS116*R	GCCGAGTAGTAGTGGATGGC
EsGRAS117*F	CAGGATAATCGCCGACAGCT
EsGRAS117*R	AGGCGATGCATCTGTAGAGC
EsGRAS118*F	CTCCACTACATCTCGCGCAT
EsGRAS118*R	TTGGTGGAGATGCTCTGCTG
EsGRAS119*F	CAGTTTGGCGTGCCATTCAA
EsGRAS119*R	CAGAAGCCACCGTTGATCCT
EsGRAS12*F	CTCCAAGATCTCCCTGGGGA
EsGRAS12*R	TTCGTAGGACATGTCGAGCG
EsGRAS120*F	GTGGAGCTCATCAAGGCCTT
EsGRAS120*R	ATCGAACAAGGCCGTGAAGT
EsGRAS121*F	GCCGAGGACCTGAACATCAA
EsGRAS121*R	GCATATAGGATGCGCCCCTT
EsGRAS122*F	ATCACCTGGCACTCCCCTAT
EsGRAS122*R	GCCTTGCTCTTTCTCCCCTT
EsGRAS123*F	ATCACCTGGCACTCCCCTAT
EsGRAS123*R	TGTTCCCAGTCTCATTGCCC
EsGRAS124*F	ACCAGCTTTACATGGCAGCT
EsGRAS124*R	TCGCATCCAGCAGGTCAAAT
EsGRAS125*F	GAGGCTGGCGCATTATTTCG
EsGRAS125*R	ATCCCTAGGGCTTGGACCAT
EsGRAS126*F	CGATGCCAACAACCTCCTCT
EsGRAS126*R	CGGCATCATCAGCTTGCTTC
EsGRAS127*F	CGGCTCAAGGAGATGGTCTC
EsGRAS127*R	ACCTCTCGTCCGAATCCAGA
EsGRAS128*F	AATGGTGCTATAGCCGAGGC
EsGRAS128*R	CCTGGGGCAAGCAACATCTA
EsGRAS129*F	AGCTGTTCGATCAAGGTGGG
EsGRAS129*R	TCGAACAACGCCGTGAAGTA
EsGRAS13*F	CCGCAGAGGTTTCACATCCT
EsGRAS13*R	TCGCCGAACACCTTCAAGAA
EsGRAS130*F	CCTTCCTCCGCTGGATCATC
EsGRAS130*R	TGAGCCGTGCCAATATCTCG
EsGRAS14*F	TAGCTTCACTCCTCCGTCCA
EsGRAS14*R	AAGTAGGGGCAGGCCTCATA
EsGRAS15*F	TCGACCTCGACATCATGCAG
EsGRAS15*R	ACGATGTTCCGTATCTCCGC
EsGRAS16*F	TGAGTTCCGCCCAGAGAAAC
EsGRAS16*R	TCACCTCGGGCATACTCTGA
EsGRAS17*F	CCGGCACTTCTTTGACCTCT
EsGRAS17*R	ATCGAATAACGCGGCGTAGT
EsGRAS18*F	ATGGAATGAATGGCACCCGT
EsGRAS18*R	TGCTGTTGAATCAGGGGCAT
EsGRAS19*F	AGATGACATTGGGAGCGTCG
EsGRAS19*R	GCTGACCTCGTGGAACTTGA
EsGRAS2*F	TGTCCATCACCACTGTCGTG
EsGRAS2*R	GCATGAGACCAGGTCCACAA
EsGRAS20*F	CTTCTAAATTCCTGCGCCGC
EsGRAS20*R	GGTGGAGACGATGACCAGTG
EsGRAS21*F	CTTCTAAATTCCTGCGCCGC
EsGRAS21*R	GTTCCACTCCTTCACGCTCA
EsGRAS22*F	ACGGAGCTGGTAAACAAGGG
EsGRAS22*R	AGCTGTAGGGTGGAGACGAT
EsGRAS23*F	ACGGAGCTGGTAAACAAGGG
EsGRAS23*R	AGCTGTAGGGTGGAGACGAT
EsGRAS24*F	ACGGAGCTGGTAAACAAGGG
EsGRAS24*R	AGCTGTAGGGTGGAGACGAT
EsGRAS25*F	AATGGCGGAAAGGAGACGTT
EsGRAS25*R	AGTGCCGTAACACGCTGTAA
EsGRAS26*F	TTGGATGGACTCCCGGATCT
EsGRAS26*R	TCCCATCTTGAAGCGGCAAT
EsGRAS27*F	CGGCTACTAACTGGCCACAA
EsGRAS27*R	CCGGCCATAGCATAGCAGAA
EsGRAS28*F	CCTTCTTTCCACGGGCATCT
EsGRAS28*R	TTCTCGTGGATGAGCTGCAG
EsGRAS29*F	CTGCAGCTCATCCACGAGAA
EsGRAS29*R	TTGTGCAGTAGTGACTCGGC
EsGRAS3*F	AGAACCCGAAGCAGTTCCAG
EsGRAS3*R	GGTTGCCCCTAGGAAAGTCC
EsGRAS30*F	ACCACCAGTACATGTACGGC
EsGRAS30*R	CTACGTTGTAGAAGGCCCGG
EsGRAS31*F	GTGCTCAACAACATCGCCTC
EsGRAS31*R	CGGAGATGGAGATGACGTGG
EsGRAS32*F	TGTTCACTGTCGTGGAGCAG
EsGRAS32*R	CTGCTCTCGCCGATGATCAT
EsGRAS33*F	CTCCTCCTCAATTGCGCTGA
EsGRAS33*R	GTCGCAAGGGACACTCTGAA
EsGRAS34*F	TCAACTGCTCCGAAGACGTC
EsGRAS34*R	AGCTGGCAGATGGAGTTCAC
EsGRAS35*F	CATCATGCCATCGCCACTTG
EsGRAS35*R	CGAAATCGACGATGTGCACC
EsGRAS36*F	TCAGAGAGGAGTCGAGGTGG
EsGRAS36*R	TTGCGATAAACCTGACCCCC
EsGRAS37*F	CACAAGCTGTGGCAGAACAC
EsGRAS37*R	TCCCATCTTGAAGCGGCAAT
EsGRAS38*F	TTCCTCCGCTGGATCATTGG
EsGRAS38*R	ATTGAGCCGCGCCAATATCT
EsGRAS39*F	GTCAAGAGAGGCAGCAGGAG
EsGRAS39*R	TAGAACTCGAACGGCATGCC
EsGRAS4*F	TCGACCTCGACATCATGCAG
EsGRAS4*R	ACGATGTTCCGTATCTCCGC
EsGRAS40*F	GTGCTCAACAACATCGCCTC
EsGRAS40*R	CTTCGGGGATGGAGATGACG
EsGRAS41*F	TACCTCAAGTTCGCGCACTT
EsGRAS41*R	AGCCGTAGTAGAACATCGCG
EsGRAS42*F	CAGCCCAAGATCTTCACGGT
EsGRAS42*R	TACCCTTACCGTTGCTGCTG
EsGRAS43*F	CACAAGCTTCTCAGGCTCCA
EsGRAS43*R	GATACTGCTTCCGCGCAATG
EsGRAS44*F	ACAATTCCCTCTGGGTGCTG
EsGRAS44*R	ATTCGGTGTGTGCAGTTTGC
EsGRAS45*F	TGAGGCCATGGAGTCTGAGA
EsGRAS45*R	CGTAGTAGTTGAGCGCCTCC
EsGRAS46*F	CTTGCGGAGGACTGTGGAAT
EsGRAS46*R	CCCCATGGTCCTCCTCAAAC
EsGRAS47*F	GGACGTTCTTGAGACCTGCA
EsGRAS47*R	GTTGCTCTCTCCCTCGAAGG
EsGRAS48*F	GGACGTTCTTGAGACCTGCA
EsGRAS48*R	GTTCAGCCCCATTGTCATGC
EsGRAS49*F	TCACATCGTCGACTATGGCG
EsGRAS49*R	GACTCGATGAGCAGCCTCTC
EsGRAS5*F	CCGAGGTGAAGGTCTGGAAC
EsGRAS5*R	CACATACGAGCTCAGCGGAT
EsGRAS50*F	GAGTATGCCCGAGGTGAAGG
EsGRAS50*R	GAACTCAGCGGGTAAGGCTT
EsGRAS51*F	GAGGCTGATGATCCACCAGG
EsGRAS51*R	TCGATGACGTGCACGATCTT
EsGRAS52*F	GACATGCAAGGACCCTCCAA
EsGRAS52*R	CAAGCTTTGGTTGAAGGCCC
EsGRAS53*F	GGACGTTCTTGAGACCTGCA
EsGRAS53*R	GTTGCTCTCTCCCTCGAAGG
EsGRAS54*F	AGGAAGACGAAGCAGTTCCG
EsGRAS54*R	TTCCAGGATAGACGCGTTCG
EsGRAS55*F	CATCAACCGCATGCTCATGG
EsGRAS55*R	AGCTTGCTCTCTTGAGGCAG
EsGRAS56*F	TCACTCCAACGACAGCTCAC
EsGRAS56*R	TACTGCTTCTGCGCAATGGA
EsGRAS57*F	CATAGAGCTACCCACGCCAG
EsGRAS57*R	TGTAACTCTCGGGCCTCTCA
EsGRAS58*F	ATGAGGCGTTCGACAAGGTT
EsGRAS58*R	AGGCGGTCCACCTTCTCTAT
EsGRAS59*F	AACCCCCAACTGCTTCATGT
EsGRAS59*R	CAGAGCTTGTAGGTTCTTTGCAC
EsGRAS6*F	TCCCGTCTCAGCCCTTTTTC
EsGRAS6*R	ACCGCTGCTTCGTTGAGTAA
EsGRAS60*F	TTTCCAAATCGCACAGGGGA
EsGRAS60*R	ACACACTGTTGCTCTGTGCT
EsGRAS61*F	CCCACAAGGTTGCAATCACC
EsGRAS61*R	TCTCTGCAACAGCCTTACCG
EsGRAS62*F	GACCTCGGTGCTCTACAACC
EsGRAS62*R	GATTGAGCCGCGCCAATATC
EsGRAS63*F	TACCATGCGGCTTCTCCAAG
EsGRAS63*R	CTGTACTCCTCCTGCTTGGC
EsGRAS64*F	CATGGAGGAGGACATCGACG
EsGRAS64*R	CCCTTGAGGAAAGCCGAGTT
EsGRAS65*F	CCGACACCGACAACAACAAC
EsGRAS65*R	GCGGTTTCCTGTACGGATGA
EsGRAS66*F	GACACTGTACGAGGTCTGCC
EsGRAS66*R	CCCTCAGGTCAATGGACTCG
EsGRAS67*F	GTGAACCTCGTCGTCCATGA
EsGRAS67*R	GTGGCTTGTCCTTCCATCCA
EsGRAS68*F	GATATTGGCGCGGCTCAATC
EsGRAS68*R	GTTTCTGTCCCGACCGTGAT
EsGRAS69*F	TGTCGTCCAGGCATCAGATG
EsGRAS69*R	CTGTACTCCTCCTGCTTGGC
EsGRAS7*F	TAAGAAGGACAACGACCCGC
EsGRAS7*R	ACCGCTGCTTCGTTGAGTAA
EsGRAS70*F	GGTCGTGGAGTTCCTCAAGG
EsGRAS70*R	TAGAAGAAGAGCGCCTCCCT
EsGRAS71*F	CCGACACCGACAACAACAAC
EsGRAS71*R	GCGGTTTCCTGTACGGATGA
EsGRAS72*F	ACCTCATGTGCGGATCACTG
EsGRAS72*R	GCCAAGGAGTTCATGCCTCT
EsGRAS73*F	CAATCGCGAGGGCAAAGATG
EsGRAS73*R	TCCATCCTTGCAAGAGCCAG
EsGRAS74*F	GTTCGACATCCCGTTCCAGT
EsGRAS74*R	CCACGATGCTCCTGATCTCC
EsGRAS75*F	CAAGAGGGAAGGTGGTCCAC
EsGRAS75*R	AGCCCTCACATGCAATCACA
EsGRAS76*F	CCCTGGTCAAGTTCTCCCAC
EsGRAS76*R	AACAGCGCCGAGTAGTAGTG
EsGRAS77*F	TTCCAGCCCGAGAGAGAGAA
EsGRAS77*R	AACTTCATCCACCCCGACAC
EsGRAS78*F	CGGGGTTCTCAGTCCTCAAC
EsGRAS78*R	GCCCTTCCACAATGTAGGCT
EsGRAS79*F	TCGCATGTGGTAAGGCTGTT
EsGRAS79*R	AGCCTCCCCAGGTCTTATGT
EsGRAS8*F	GTGCAGCACCTCTTCTACGT
EsGRAS8*R	AAGTCATGCGCCGAGTCTAG
EsGRAS80*F	CATCAAGCGGATGTGCACTG
EsGRAS80*R	TGGAAATCGATGCGGATGGT
EsGRAS81*F	GTCGACATCATTGCTGACGC
EsGRAS81*R	CAATGTAATGCGCCAGCCTC
EsGRAS82*F	CAAAGCAATTTGGCGTCCCA
EsGRAS82*R	CAGAAGCCACCGTTGATCCT
EsGRAS83*F	GTGTTGGGTTCAATGGCCAC
EsGRAS83*R	TGAGCATGTCCACAGCTGAG
EsGRAS84*F	GTTCGACATCCCGTTCCAGT
EsGRAS84*R	CCACGATGCTCCTGATCTCC
EsGRAS85*F	CCCTGGCGGTGATAAGCTAG
EsGRAS85*R	TATGGTACTGCTGGCTCCCT
EsGRAS86*F	CTTCTCCCCAACGCTCCAAT
EsGRAS86*R	AGTGCGAGAACTTGACGAGG
EsGRAS87*F	GTCAAGCCGGGTTAAGGACA
EsGRAS87*R	TACGTCGTCGGAAGCATACG
EsGRAS88*F	TCGGTTGTTGTCGCTGATGA
EsGRAS88*R	GGTAGTTCGCCGAGTAGCTC
EsGRAS89*F	GGCGCAAACTTGGTTCACAT
EsGRAS89*R	TATCCCTTGCAACGCAGTGT
EsGRAS9*F	CAAAGGGGAGAAGGAGCTGG
EsGRAS9*R	AGCTGTAGGGTGGAGACGAT
EsGRAS90*F	AAGGGTATGACAAGCGTGCA
EsGRAS90*R	TCCCGTCCGAAGTATTCCCT
EsGRAS91*F	TTGAACTGGATCATGGGGGC
EsGRAS91*R	GCTTAGGTGGTTTCGGGTGA
EsGRAS92*F	TCAACCTCCCATTCCGCTTC
EsGRAS92*R	AGTGTAGCCGCAGAAGTAGC
EsGRAS93*F	ACTGCGTGCTATTCCTCCAC
EsGRAS93*R	CCACGAAGACACCGACATGA
EsGRAS94*F	CGGCTCAAGGAGATGGTCTC
EsGRAS94*R	GGCTTGGTGGAGTATGCAGT
EsGRAS95*F	AATGGTGCTATAGCCGAGGC
EsGRAS95*R	CCTGGGGCAAGCAACATCTA
EsGRAS96*F	ATCTTGACCTCGACCGCATC
EsGRAS96*R	TTGTAGGCACCGAGCTTGAG
EsGRAS97*F	TCCAGATGGCAGCCTTCAAG
EsGRAS97*R	GGCACGAGCACGATGATTTC
EsGRAS98*F	TTCTACGAGTCGTGCCCCTA
EsGRAS98*R	AGGAATGAGCCGGAGTTGTG
EsGRAS99*F	GCTGGATGGAGAGCCTCATC
EsGRAS99*R	ACGATGCCGAAGTCAACGAT
EsACT1-F	GATCTGTCCAAGCACCCCTC
EsACT1-R	CTTCTCTCACCTTTGCCCCG

## Sheet: Supplementary table 4
Statistics of promoter cis-elements
evm.model.Chr01.18120	ABRE3a
evm.model.Chr01.18120	ABRE3a
evm.model.Chr01.18120	ARE
evm.model.Chr01.18120	ARE
evm.model.Chr01.18120	ARE
evm.model.Chr01.18120	ARE
evm.model.Chr01.18120	CGTCA-motif
evm.model.Chr01.18120	CGTCA-motif
evm.model.Chr01.18120	GC-motif
evm.model.Chr01.18120	Sp1
evm.model.Chr01.18120	CAT-box
evm.model.Chr01.18120	G-box
evm.model.Chr01.18120	G-box
evm.model.Chr01.18120	G-box
evm.model.Chr01.18120	G-box
evm.model.Chr01.18120	G-box
evm.model.Chr01.18120	G-box
evm.model.Chr01.18120	G-box
evm.model.Chr01.18120	G-box
evm.model.Chr01.18120	G-box
evm.model.Chr01.18120	ABRE4
evm.model.Chr01.18120	ABRE4
evm.model.Chr01.18120	ABRE
evm.model.Chr01.18120	ABRE
evm.model.Chr01.18120	ABRE
evm.model.Chr01.18120	ABRE
evm.model.Chr01.18120	ABRE
evm.model.Chr01.18120	ABRE
evm.model.Chr01.18120	ABRE
evm.model.Chr01.18120	ABRE
evm.model.Chr01.18120	ABRE
evm.model.Chr01.18120	ABRE
evm.model.Chr01.18120	ABRE
evm.model.Chr01.18120	ABRE
evm.model.Chr01.18120	ABRE
evm.model.Chr01.18120	ABRE
evm.model.Chr01.18120	ABRE
evm.model.Chr01.18120	G-Box
evm.model.Chr01.18120	G-Box
evm.model.Chr01.18120	G-Box
evm.model.Chr01.18120	G-Box
evm.model.Chr01.18120	G-Box
evm.model.Chr01.18120	TCA
evm.model.Chr01.19209	ABRE
evm.model.Chr01.19209	ABRE
evm.model.Chr01.19209	ABRE
evm.model.Chr01.19209	ABRE
evm.model.Chr01.19209	ABRE
evm.model.Chr01.19209	G-Box
evm.model.Chr01.19209	G-box
evm.model.Chr01.19209	G-box
evm.model.Chr01.19209	G-box
evm.model.Chr01.19209	G-box
evm.model.Chr01.19209	G-box
evm.model.Chr01.19209	G-box
evm.model.Chr01.19209	G-box
evm.model.Chr01.19209	G-box
evm.model.Chr01.19209	G-box
evm.model.Chr01.19209	ABRE2
evm.model.Chr01.19209	TGA-element
evm.model.Chr01.19209	Sp1
evm.model.Chr01.19209	Sp1
evm.model.Chr01.19209	Sp1
evm.model.Chr01.19209	GC-motif
evm.model.Chr01.19209	CAT-box
evm.model.Chr01.19209	CAT-box
evm.model.Chr01.19209	CAT-box
evm.model.Chr01.20585	CAT-box
evm.model.Chr01.20585	CAT-box
evm.model.Chr01.20585	CAT-box
evm.model.Chr01.20585	CAT-box
evm.model.Chr01.20585	MSA-like
evm.model.Chr01.20585	ABRE3a
evm.model.Chr01.20585	ARE
evm.model.Chr01.20585	CGTCA-motif
evm.model.Chr01.20585	CGTCA-motif
evm.model.Chr01.20585	CGTCA-motif
evm.model.Chr01.20585	ABRE
evm.model.Chr01.20585	ABRE
evm.model.Chr01.20585	G-box
evm.model.Chr01.20585	G-box
evm.model.Chr01.20585	G-box
evm.model.Chr01.20585	ABRE4
evm.model.Chr01.22082	GATA-motif
evm.model.Chr01.22082	CGTCA-motif
evm.model.Chr01.22082	CGTCA-motif
evm.model.Chr01.22082	CGTCA-motif
evm.model.Chr01.22082	CGTCA-motif
evm.model.Chr01.22082	Box 4
evm.model.Chr01.22082	Box 4
evm.model.Chr01.22082	Box 4
evm.model.Chr01.22082	Box 4
evm.model.Chr01.22082	Box 4
evm.model.Chr01.22082	Box 4
evm.model.Chr01.22082	Box 4
evm.model.Chr01.22082	Box 4
evm.model.Chr01.22082	Box 4
evm.model.Chr01.22082	Box 4
evm.model.Chr01.22082	Box 4
evm.model.Chr01.22082	Box 4
evm.model.Chr01.22082	Box 4
evm.model.Chr01.22082	ARE
evm.model.Chr01.22082	ABRE3a
evm.model.Chr01.22082	MSA-like
evm.model.Chr01.22082	CAT-box
evm.model.Chr01.22082	GCN4_motif
evm.model.Chr01.22082	TCA-element
evm.model.Chr01.22082	MBS
evm.model.Chr01.22082	ABRE4
evm.model.Chr01.22082	circadian
evm.model.Chr01.22082	G-box
evm.model.Chr01.22082	G-box
evm.model.Chr01.22082	G-box
evm.model.Chr01.22082	TCA
evm.model.Chr01.22082	G-Box
evm.model.Chr01.22082	G-Box
evm.model.Chr01.22082	ABRE
evm.model.Chr01.22082	ABRE
evm.model.Chr01.22082	ABRE
evm.model.Chr01.22082	ABRE
evm.model.Chr01.22082	ABRE
evm.model.Chr01.22106	G-box
evm.model.Chr01.22106	G-box
evm.model.Chr01.22106	G-box
evm.model.Chr01.22106	G-box
evm.model.Chr01.22106	G-box
evm.model.Chr01.22106	G-box
evm.model.Chr01.22106	G-box
evm.model.Chr01.22106	TGA-element
evm.model.Chr01.22106	ABRE4
evm.model.Chr01.22106	ABRE
evm.model.Chr01.22106	ABRE
evm.model.Chr01.22106	ABRE
evm.model.Chr01.22106	ABRE
evm.model.Chr01.22106	ABRE
evm.model.Chr01.22106	ABRE
evm.model.Chr01.22106	ABRE
evm.model.Chr01.22106	ABRE
evm.model.Chr01.22106	ABRE
evm.model.Chr01.22106	ABRE
evm.model.Chr01.22106	G-Box
evm.model.Chr01.22106	G-Box
evm.model.Chr01.22106	G-Box
evm.model.Chr01.22106	G-Box
evm.model.Chr01.22106	ARE
evm.model.Chr01.22106	ARE
evm.model.Chr01.22106	ABRE3a
evm.model.Chr01.22106	GATA-motif
evm.model.Chr01.22106	Box 4
evm.model.Chr01.22106	Box 4
evm.model.Chr01.22106	Box 4
evm.model.Chr01.22106	Box 4
evm.model.Chr01.22106	Box 4
evm.model.Chr01.22106	Box 4
evm.model.Chr01.22106	Box 4
evm.model.Chr01.22106	Box 4
evm.model.Chr01.22106	Box 4
evm.model.Chr01.22106	Box 4
evm.model.Chr01.22106	CGTCA-motif
evm.model.Chr01.22106	CGTCA-motif
evm.model.Chr01.22106	CGTCA-motif
evm.model.Chr01.22106	TC-rich repeats
evm.model.Chr01.22106	TCA-element
evm.model.Chr01.22106	CAT-box
evm.model.Chr01.22106	MBSI
evm.model.Chr01.7082	G-box
evm.model.Chr01.7082	G-box
evm.model.Chr01.7082	G-box
evm.model.Chr01.7082	MBS
evm.model.Chr01.7082	ABRE
evm.model.Chr01.7082	ABRE
evm.model.Chr01.7082	ABRE
evm.model.Chr01.7082	ABRE
evm.model.Chr01.7082	G-Box
evm.model.Chr01.7082	O2-site
evm.model.Chr01.7082	ARE
evm.model.Chr01.7082	ARE
evm.model.Chr01.7082	ARE
evm.model.Chr01.7082	RY-element
evm.model.Chr01.7082	Box 4
evm.model.Chr01.7082	CGTCA-motif
evm.model.Chr01.7082	CGTCA-motif
evm.model.Chr01.7082	CGTCA-motif
evm.model.Chr01.7190	CAT-box
evm.model.Chr01.7190	CAT-box
evm.model.Chr01.7190	GC-motif
evm.model.Chr01.7190	O2-site
evm.model.Chr01.7190	ARE
evm.model.Chr01.7190	ARE
evm.model.Chr01.7190	ARE
evm.model.Chr01.7190	ABRE3a
evm.model.Chr01.7190	ABRE3a
evm.model.Chr01.7190	ABRE3a
evm.model.Chr01.7190	G-Box
evm.model.Chr01.7190	G-Box
evm.model.Chr01.7190	ABRE
evm.model.Chr01.7190	ABRE
evm.model.Chr01.7190	ABRE
evm.model.Chr01.7190	ABRE
evm.model.Chr01.7190	ABRE
evm.model.Chr01.7190	ABRE
evm.model.Chr01.7190	ABRE
evm.model.Chr01.7190	ABRE4
evm.model.Chr01.7190	ABRE4
evm.model.Chr01.7190	ABRE4
evm.model.Chr01.7190	P-box
evm.model.Chr01.7190	P-box
evm.model.Chr01.7190	G-box
evm.model.Chr01.7190	G-box
evm.model.Chr01.7190	G-box
evm.model.Chr01.7190	G-box
evm.model.Chr01.7423	ARE
evm.model.Chr01.7423	ARE
evm.model.Chr01.7423	O2-site
evm.model.Chr01.7423	GATA-motif
evm.model.Chr01.7423	CGTCA-motif
evm.model.Chr01.7423	CGTCA-motif
evm.model.Chr01.7423	CGTCA-motif
evm.model.Chr01.7423	CGTCA-motif
evm.model.Chr01.7423	CGTCA-motif
evm.model.Chr01.7423	CGTCA-motif
evm.model.Chr01.7423	Box 4
evm.model.Chr01.7423	GC-motif
evm.model.Chr01.7423	Sp1
evm.model.Chr01.7423	Sp1
evm.model.Chr01.7423	Sp1
evm.model.Chr01.7423	G-box
evm.model.Chr01.7423	G-box
evm.model.Chr01.7423	G-box
evm.model.Chr01.7423	G-box
evm.model.Chr01.7423	G-box
evm.model.Chr01.7423	TGA-element
evm.model.Chr01.7423	MBS
evm.model.Chr01.7423	P-box
evm.model.Chr01.7423	ABRE
evm.model.Chr01.7423	ABRE
evm.model.Chr01.7423	ABRE
evm.model.Chr01.7423	TCA
evm.model.Chr01.7423	G-Box
evm.model.Chr01.7755	GATA-motif
evm.model.Chr01.7755	CGTCA-motif
evm.model.Chr01.7755	CGTCA-motif
evm.model.Chr01.7755	CGTCA-motif
evm.model.Chr01.7755	O2-site
evm.model.Chr01.7755	O2-site
evm.model.Chr01.7755	O2-site
evm.model.Chr01.7755	ARE
evm.model.Chr01.7755	ABRE3a
evm.model.Chr01.7755	CAT-box
evm.model.Chr01.7755	CAT-box
evm.model.Chr01.7755	CAT-box
evm.model.Chr01.7755	Sp1
evm.model.Chr01.7755	Sp1
evm.model.Chr01.7755	Sp1
evm.model.Chr01.7755	Sp1
evm.model.Chr01.7755	Sp1
evm.model.Chr01.7755	GC-motif
evm.model.Chr01.7755	GC-motif
evm.model.Chr01.7755	GC-motif
evm.model.Chr01.7755	TGA-element
evm.model.Chr01.7755	ABRE4
evm.model.Chr01.7755	MBS
evm.model.Chr01.7755	G-box
evm.model.Chr01.7755	G-box
evm.model.Chr01.7755	G-box
evm.model.Chr01.7755	G-box
evm.model.Chr01.7755	G-box
evm.model.Chr01.7755	TCA
evm.model.Chr01.7755	G-Box
evm.model.Chr01.7755	G-Box
evm.model.Chr01.7755	GT1-motif
evm.model.Chr01.7755	ABRE
evm.model.Chr01.7755	ABRE
evm.model.Chr01.7755	ABRE
evm.model.Chr01.7755	ABRE
evm.model.Chr01.7755	ABRE
evm.model.Chr01.8450	ABRE
evm.model.Chr01.8450	G-Box
evm.model.Chr01.8450	G-box
evm.model.Chr01.8450	Sp1
evm.model.Chr01.8450	GC-motif
evm.model.Chr01.8450	CAT-box
evm.model.Chr01.8450	GCN4_motif
evm.model.Chr01.8450	ARE
evm.model.Chr01.8450	ARE
evm.model.Chr01.8450	ARE
evm.model.Chr01.8450	ARE
evm.model.Chr01.8450	O2-site
evm.model.Chr01.8450	GATA-motif
evm.model.Chr01.8450	CGTCA-motif
evm.model.Chr01.8450	Box 4
evm.model.Chr01.8450	Box 4
evm.model.Chr02.17520	CAT-box
evm.model.Chr02.17520	CAT-box
evm.model.Chr02.17520	TCA-element
evm.model.Chr02.17520	Sp1
evm.model.Chr02.17520	Sp1
evm.model.Chr02.17520	Sp1
evm.model.Chr02.17520	Sp1
evm.model.Chr02.17520	GC-motif
evm.model.Chr02.17520	GC-motif
evm.model.Chr02.17520	GC-motif
evm.model.Chr02.17520	GC-motif
evm.model.Chr02.17520	GC-motif
evm.model.Chr02.17520	Box 4
evm.model.Chr02.17520	CGTCA-motif
evm.model.Chr02.17520	CGTCA-motif
evm.model.Chr02.17520	CGTCA-motif
evm.model.Chr02.17520	CGTCA-motif
evm.model.Chr02.17520	ABRE3a
evm.model.Chr02.17520	ABRE3a
evm.model.Chr02.17520	G-Box
evm.model.Chr02.17520	G-Box
evm.model.Chr02.17520	GT1-motif
evm.model.Chr02.17520	GT1-motif
evm.model.Chr02.17520	GT1-motif
evm.model.Chr02.17520	ABRE
evm.model.Chr02.17520	ABRE
evm.model.Chr02.17520	ABRE
evm.model.Chr02.17520	ABRE
evm.model.Chr02.17520	ABRE
evm.model.Chr02.17520	ABRE
evm.model.Chr02.17520	ABRE
evm.model.Chr02.17520	ABRE4
evm.model.Chr02.17520	ABRE4
evm.model.Chr02.17520	TGA-element
evm.model.Chr02.17520	TGA-element
evm.model.Chr02.17520	G-box
evm.model.Chr02.17520	G-box
evm.model.Chr02.17520	G-box
evm.model.Chr02.17520	G-box
evm.model.Chr02.17520	G-box
evm.model.Chr02.17520	G-box
evm.model.Chr02.17520	G-box
evm.model.Chr02.19199	CGTCA-motif
evm.model.Chr02.19199	CGTCA-motif
evm.model.Chr02.19199	ABRE3a
evm.model.Chr02.19199	ARE
evm.model.Chr02.19199	TC-rich repeats
evm.model.Chr02.19199	TC-rich repeats
evm.model.Chr02.19199	GC-motif
evm.model.Chr02.19199	GC-motif
evm.model.Chr02.19199	Sp1
evm.model.Chr02.19199	Sp1
evm.model.Chr02.19199	ABRE4
evm.model.Chr02.19199	P-box
evm.model.Chr02.19199	G-box
evm.model.Chr02.19199	G-box
evm.model.Chr02.19199	G-box
evm.model.Chr02.19199	G-box
evm.model.Chr02.19199	G-box
evm.model.Chr02.19199	G-box
evm.model.Chr02.19199	GT1-motif
evm.model.Chr02.19199	G-Box
evm.model.Chr02.19199	G-Box
evm.model.Chr02.19199	G-Box
evm.model.Chr02.19199	G-Box
evm.model.Chr02.19199	ABRE
evm.model.Chr02.19199	ABRE
evm.model.Chr02.19199	ABRE
evm.model.Chr02.19199	ABRE
evm.model.Chr02.19199	ABRE
evm.model.Chr02.19199	ABRE
evm.model.Chr02.19199	ABRE
evm.model.Chr02.19199	ABRE
evm.model.Chr02.19199	ABRE
evm.model.Chr02.19199	ABRE
evm.model.Chr02.20403	GC-motif
evm.model.Chr02.20403	Box 4
evm.model.Chr02.20403	Box 4
evm.model.Chr02.20403	Box 4
evm.model.Chr02.20403	ARE
evm.model.Chr02.20403	G-Box
evm.model.Chr02.20403	ABRE
evm.model.Chr02.21979	Sp1
evm.model.Chr02.21979	TCA-element
evm.model.Chr02.21979	GCN4_motif
evm.model.Chr02.21979	ARE
evm.model.Chr02.21979	O2-site
evm.model.Chr02.21979	O2-site
evm.model.Chr02.21979	ABRE3a
evm.model.Chr02.21979	ABRE3a
evm.model.Chr02.21979	ABRE3a
evm.model.Chr02.21979	GATA-motif
evm.model.Chr02.21979	Box 4
evm.model.Chr02.21979	ABRE
evm.model.Chr02.21979	ABRE
evm.model.Chr02.21979	ABRE
evm.model.Chr02.21979	ABRE
evm.model.Chr02.21979	ABRE
evm.model.Chr02.21979	ABRE
evm.model.Chr02.21979	GT1-motif
evm.model.Chr02.21979	G-Box
evm.model.Chr02.21979	G-Box
evm.model.Chr02.21979	G-box
evm.model.Chr02.21979	G-box
evm.model.Chr02.21979	G-box
evm.model.Chr02.21979	G-box
evm.model.Chr02.21979	G-box
evm.model.Chr02.21979	G-box
evm.model.Chr02.21979	G-box
evm.model.Chr02.21979	G-box
evm.model.Chr02.21979	TGA-element
evm.model.Chr02.21979	ABRE4
evm.model.Chr02.21979	ABRE4
evm.model.Chr02.21979	ABRE4
evm.model.Chr02.21980	GCN4_motif
evm.model.Chr02.21980	TCA-element
evm.model.Chr02.21980	Sp1
evm.model.Chr02.21980	Box 4
evm.model.Chr02.21980	GATA-motif
evm.model.Chr02.21980	ABRE3a
evm.model.Chr02.21980	ABRE3a
evm.model.Chr02.21980	ABRE3a
evm.model.Chr02.21980	ARE
evm.model.Chr02.21980	O2-site
evm.model.Chr02.21980	O2-site
evm.model.Chr02.21980	GT1-motif
evm.model.Chr02.21980	G-Box
evm.model.Chr02.21980	G-Box
evm.model.Chr02.21980	ABRE
evm.model.Chr02.21980	ABRE
evm.model.Chr02.21980	ABRE
evm.model.Chr02.21980	ABRE
evm.model.Chr02.21980	ABRE
evm.model.Chr02.21980	ABRE
evm.model.Chr02.21980	ABRE4
evm.model.Chr02.21980	ABRE4
evm.model.Chr02.21980	ABRE4
evm.model.Chr02.21980	TGA-element
evm.model.Chr02.21980	G-box
evm.model.Chr02.21980	G-box
evm.model.Chr02.21980	G-box
evm.model.Chr02.21980	G-box
evm.model.Chr02.21980	G-box
evm.model.Chr02.21980	G-box
evm.model.Chr02.21980	G-box
evm.model.Chr02.21980	G-box
evm.model.Chr02.21995	CAT-box
evm.model.Chr02.21995	GC-motif
evm.model.Chr02.21995	TCA-element
evm.model.Chr02.21995	GATA-motif
evm.model.Chr02.21995	GATA-motif
evm.model.Chr02.21995	CGTCA-motif
evm.model.Chr02.21995	Box 4
evm.model.Chr02.21995	Box 4
evm.model.Chr02.21995	Box 4
evm.model.Chr02.21995	Box 4
evm.model.Chr02.21995	Box 4
evm.model.Chr02.21995	Box 4
evm.model.Chr02.21995	Box 4
evm.model.Chr02.21995	Box 4
evm.model.Chr02.21995	Box 4
evm.model.Chr02.21995	Box 4
evm.model.Chr02.21995	Box 4
evm.model.Chr02.21995	ABRE3a
evm.model.Chr02.21995	G-Box
evm.model.Chr02.21995	G-Box
evm.model.Chr02.21995	G-Box
evm.model.Chr02.21995	ABRE
evm.model.Chr02.21995	ABRE
evm.model.Chr02.21995	ABRE
evm.model.Chr02.21995	ABRE
evm.model.Chr02.21995	ABRE
evm.model.Chr02.21995	ABRE
evm.model.Chr02.21995	ABRE
evm.model.Chr02.21995	TGA-element
evm.model.Chr02.21995	TGA-element
evm.model.Chr02.21995	TGA-element
evm.model.Chr02.21995	TGA-element
evm.model.Chr02.21995	ABRE4
evm.model.Chr02.21995	G-box
evm.model.Chr02.21995	G-box
evm.model.Chr02.21995	G-box
evm.model.Chr02.21995	G-box
evm.model.Chr02.21996	ABRE
evm.model.Chr02.21996	ABRE
evm.model.Chr02.21996	ABRE
evm.model.Chr02.21996	ABRE
evm.model.Chr02.21996	ABRE
evm.model.Chr02.21996	ABRE
evm.model.Chr02.21996	ABRE
evm.model.Chr02.21996	ABRE
evm.model.Chr02.21996	G-Box
evm.model.Chr02.21996	G-Box
evm.model.Chr02.21996	G-Box
evm.model.Chr02.21996	G-Box
evm.model.Chr02.21996	G-box
evm.model.Chr02.21996	G-box
evm.model.Chr02.21996	G-box
evm.model.Chr02.21996	G-box
evm.model.Chr02.21996	ABRE4
evm.model.Chr02.21996	TGA-element
evm.model.Chr02.21996	TGA-element
evm.model.Chr02.21996	TGA-element
evm.model.Chr02.21996	TGA-element
evm.model.Chr02.21996	TCA-element
evm.model.Chr02.21996	GC-motif
evm.model.Chr02.21996	CAT-box
evm.model.Chr02.21996	ABRE3a
evm.model.Chr02.21996	CGTCA-motif
evm.model.Chr02.21996	Box 4
evm.model.Chr02.21996	Box 4
evm.model.Chr02.21996	Box 4
evm.model.Chr02.21996	Box 4
evm.model.Chr02.21996	Box 4
evm.model.Chr02.21996	Box 4
evm.model.Chr02.21996	Box 4
evm.model.Chr02.21996	Box 4
evm.model.Chr02.21996	Box 4
evm.model.Chr02.21996	Box 4
evm.model.Chr02.21996	Box 4
evm.model.Chr02.21996	GATA-motif
evm.model.Chr02.21996	GATA-motif
evm.model.Chr02.21999	ABRE
evm.model.Chr02.21999	ABRE
evm.model.Chr02.21999	ABRE
evm.model.Chr02.21999	ABRE
evm.model.Chr02.21999	ABRE4
evm.model.Chr02.21999	MBS
evm.model.Chr02.21999	MBS
evm.model.Chr02.21999	G-box
evm.model.Chr02.21999	G-box
evm.model.Chr02.21999	G-box
evm.model.Chr02.21999	CAT-box
evm.model.Chr02.21999	GC-motif
evm.model.Chr02.21999	GC-motif
evm.model.Chr02.21999	GC-motif
evm.model.Chr02.21999	GC-motif
evm.model.Chr02.21999	CGTCA-motif
evm.model.Chr02.21999	CGTCA-motif
evm.model.Chr02.21999	CGTCA-motif
evm.model.Chr02.21999	CGTCA-motif
evm.model.Chr02.21999	CGTCA-motif
evm.model.Chr02.21999	GATA-motif
evm.model.Chr02.21999	ABRE3a
evm.model.Chr02.21999	O2-site
evm.model.Chr02.21999	O2-site
evm.model.Chr02.4465	GT1-motif
evm.model.Chr02.4465	GT1-motif
evm.model.Chr02.4465	GT1-motif
evm.model.Chr02.4465	G-Box
evm.model.Chr02.4465	G-Box
evm.model.Chr02.4465	G-Box
evm.model.Chr02.4465	G-Box
evm.model.Chr02.4465	ABRE
evm.model.Chr02.4465	ABRE
evm.model.Chr02.4465	ABRE
evm.model.Chr02.4465	ABRE
evm.model.Chr02.4465	ABRE
evm.model.Chr02.4465	ABRE
evm.model.Chr02.4465	ABRE
evm.model.Chr02.4465	MBS
evm.model.Chr02.4465	MBS
evm.model.Chr02.4465	ABRE4
evm.model.Chr02.4465	ABRE4
evm.model.Chr02.4465	TGA-element
evm.model.Chr02.4465	G-box
evm.model.Chr02.4465	G-box
evm.model.Chr02.4465	G-box
evm.model.Chr02.4465	G-box
evm.model.Chr02.4465	G-box
evm.model.Chr02.4465	CAT-box
evm.model.Chr02.4465	Box 4
evm.model.Chr02.4465	Box 4
evm.model.Chr02.4465	ABRE3a
evm.model.Chr02.4465	ABRE3a
evm.model.Chr02.4465	ARE
evm.model.Chr02.7906	G-Box
evm.model.Chr02.7906	G-Box
evm.model.Chr02.7906	ABRE
evm.model.Chr02.7906	ABRE
evm.model.Chr02.7906	ABRE
evm.model.Chr02.7906	ABRE
evm.model.Chr02.7906	ABRE
evm.model.Chr02.7906	ABRE
evm.model.Chr02.7906	ABRE
evm.model.Chr02.7906	ABRE4
evm.model.Chr02.7906	MBS
evm.model.Chr02.7906	G-box
evm.model.Chr02.7906	G-box
evm.model.Chr02.7906	G-box
evm.model.Chr02.7906	G-box
evm.model.Chr02.7906	CAT-box
evm.model.Chr02.7906	GC-motif
evm.model.Chr02.7906	GC-motif
evm.model.Chr02.7906	Box 4
evm.model.Chr02.7906	CGTCA-motif
evm.model.Chr02.7906	ABRE3a
evm.model.Chr02.7906	RY-element
evm.model.Chr02.7906	RY-element
evm.model.Chr02.7906	O2-site
evm.model.Chr02.7906	ARE
evm.model.Chr02.7906	ARE
evm.model.Chr02.7906	ARE
evm.model.Chr02.7979	ABRE
evm.model.Chr02.7979	ABRE
evm.model.Chr02.7979	ABRE
evm.model.Chr02.7979	ABRE
evm.model.Chr02.7979	ABRE
evm.model.Chr02.7979	ABRE
evm.model.Chr02.7979	ABRE
evm.model.Chr02.7979	P-box
evm.model.Chr02.7979	ABRE4
evm.model.Chr02.7979	ABRE4
evm.model.Chr02.7979	TCA-element
evm.model.Chr02.7979	GC-motif
evm.model.Chr02.7979	CAT-box
evm.model.Chr02.7979	CAT-box
evm.model.Chr02.7979	MSA-like
evm.model.Chr02.7979	ABRE3a
evm.model.Chr02.7979	ABRE3a
evm.model.Chr02.7979	ARE
evm.model.Chr02.7979	ARE
evm.model.Chr02.7979	GATA-motif
evm.model.Chr02.7979	G-Box
evm.model.Chr02.7979	G-Box
evm.model.Chr02.7979	G-box
evm.model.Chr02.7979	G-box
evm.model.Chr02.7979	G-box
evm.model.Chr02.7979	CGTCA-motif
evm.model.Chr02.7979	CGTCA-motif
evm.model.Chr02.7979	CGTCA-motif
evm.model.Chr02.8105	ABRE
evm.model.Chr02.8105	ABRE
evm.model.Chr02.8105	ABRE
evm.model.Chr02.8105	G-Box
evm.model.Chr02.8105	G-box
evm.model.Chr02.8105	G-box
evm.model.Chr02.8105	G-box
evm.model.Chr02.8105	G-box
evm.model.Chr02.8105	Sp1
evm.model.Chr02.8105	Sp1
evm.model.Chr02.8105	Sp1
evm.model.Chr02.8105	Sp1
evm.model.Chr02.8105	O2-site
evm.model.Chr02.8105	ARE
evm.model.Chr02.8105	ARE
evm.model.Chr02.8105	Box 4
evm.model.Chr02.8105	CGTCA-motif
evm.model.Chr02.8105	CGTCA-motif
evm.model.Chr02.8105	CGTCA-motif
evm.model.Chr02.8105	CGTCA-motif
evm.model.Chr02.8105	CGTCA-motif
evm.model.Chr02.8105	CGTCA-motif
evm.model.Chr02.8105	CGTCA-motif
evm.model.Chr02.8519	ABRE4
evm.model.Chr02.8519	G-box
evm.model.Chr02.8519	G-box
evm.model.Chr02.8519	G-box
evm.model.Chr02.8519	G-box
evm.model.Chr02.8519	GT1-motif
evm.model.Chr02.8519	GT1-motif
evm.model.Chr02.8519	GT1-motif
evm.model.Chr02.8519	ABRE
evm.model.Chr02.8519	ABRE
evm.model.Chr02.8519	ABRE
evm.model.Chr02.8519	CGTCA-motif
evm.model.Chr02.8519	CGTCA-motif
evm.model.Chr02.8519	CGTCA-motif
evm.model.Chr02.8519	ABRE3a
evm.model.Chr02.8519	O2-site
evm.model.Chr02.8519	CAT-box
evm.model.Chr02.8519	CAT-box
evm.model.Chr02.8519	CAT-box
evm.model.Chr02.8519	TC-rich repeats
evm.model.Chr02.8519	Sp1
evm.model.Chr02.8519	Sp1
evm.model.Chr02.8519	Sp1
evm.model.Chr02.8519	Sp1
evm.model.Chr02.8519	Sp1
evm.model.Chr02.8519	Sp1
evm.model.Chr02.8519	GC-motif
evm.model.Chr02.8519	GC-motif
evm.model.Chr02.8983	G-box
evm.model.Chr02.8983	Sp1
evm.model.Chr02.8983	GCN4_motif
evm.model.Chr02.8983	O2-site
evm.model.Chr02.8983	ARE
evm.model.Chr02.8983	ARE
evm.model.Chr02.8983	ARE
evm.model.Chr02.8983	Box 4
evm.model.Chr02.8983	Box 4
evm.model.Chr02.8983	CGTCA-motif
evm.model.Chr03.11804	ARE
evm.model.Chr03.11804	ARE
evm.model.Chr03.11804	ARE
evm.model.Chr03.11804	RY-element
evm.model.Chr03.11804	Box 4
evm.model.Chr03.11804	CGTCA-motif
evm.model.Chr03.11804	CGTCA-motif
evm.model.Chr03.11804	CAT-box
evm.model.Chr03.11804	G-box
evm.model.Chr03.11804	MBS
evm.model.Chr03.11804	MBS
evm.model.Chr03.11804	P-box
evm.model.Chr03.11804	GT1-motif
evm.model.Chr03.14314	GT1-motif
evm.model.Chr03.14314	ABRE
evm.model.Chr03.14314	ABRE
evm.model.Chr03.14314	TGA-element
evm.model.Chr03.14314	G-box
evm.model.Chr03.14314	GC-motif
evm.model.Chr03.14314	GC-motif
evm.model.Chr03.14314	CGTCA-motif
evm.model.Chr03.14314	CGTCA-motif
evm.model.Chr03.14314	Box 4
evm.model.Chr03.14314	GATA-motif
evm.model.Chr03.14314	GATA-motif
evm.model.Chr03.14314	ARE
evm.model.Chr03.14314	ARE
evm.model.Chr03.14314	ARE
evm.model.Chr03.14314	ARE
evm.model.Chr03.14314	ARE
evm.model.Chr03.14314	RY-element
evm.model.Chr03.14850	ABRE
evm.model.Chr03.14850	ABRE
evm.model.Chr03.14850	ABRE
evm.model.Chr03.14850	ABRE
evm.model.Chr03.14850	ABRE
evm.model.Chr03.14850	G-Box
evm.model.Chr03.14850	G-box
evm.model.Chr03.14850	G-box
evm.model.Chr03.14850	G-box
evm.model.Chr03.14850	MBS
evm.model.Chr03.14850	ABRE4
evm.model.Chr03.14850	TGA-element
evm.model.Chr03.14850	TC-rich repeats
evm.model.Chr03.14850	ABRE3a
evm.model.Chr03.14850	RY-element
evm.model.Chr03.14850	ARE
evm.model.Chr03.14850	ARE
evm.model.Chr03.14850	CGTCA-motif
evm.model.Chr03.14850	CGTCA-motif
evm.model.Chr03.14850	CGTCA-motif
evm.model.Chr03.14850	Box 4
evm.model.Chr03.15332	ABRE4
evm.model.Chr03.15332	ABRE4
evm.model.Chr03.15332	ABRE4
evm.model.Chr03.15332	TGA-element
evm.model.Chr03.15332	TGA-element
evm.model.Chr03.15332	G-box
evm.model.Chr03.15332	G-box
evm.model.Chr03.15332	G-box
evm.model.Chr03.15332	G-box
evm.model.Chr03.15332	G-box
evm.model.Chr03.15332	G-box
evm.model.Chr03.15332	G-box
evm.model.Chr03.15332	G-box
evm.model.Chr03.15332	G-box
evm.model.Chr03.15332	G-box
evm.model.Chr03.15332	G-box
evm.model.Chr03.15332	G-Box
evm.model.Chr03.15332	G-Box
evm.model.Chr03.15332	G-Box
evm.model.Chr03.15332	G-Box
evm.model.Chr03.15332	GT1-motif
evm.model.Chr03.15332	ABRE
evm.model.Chr03.15332	ABRE
evm.model.Chr03.15332	ABRE
evm.model.Chr03.15332	ABRE
evm.model.Chr03.15332	ABRE
evm.model.Chr03.15332	ABRE
evm.model.Chr03.15332	ABRE
evm.model.Chr03.15332	ABRE
evm.model.Chr03.15332	ABRE
evm.model.Chr03.15332	ABRE
evm.model.Chr03.15332	ABRE
evm.model.Chr03.15332	ABRE
evm.model.Chr03.15332	ABRE
evm.model.Chr03.15332	ABRE
evm.model.Chr03.15332	CGTCA-motif
evm.model.Chr03.15332	CGTCA-motif
evm.model.Chr03.15332	CGTCA-motif
evm.model.Chr03.15332	CGTCA-motif
evm.model.Chr03.15332	GATA-motif
evm.model.Chr03.15332	GATA-motif
evm.model.Chr03.15332	ABRE3a
evm.model.Chr03.15332	ABRE3a
evm.model.Chr03.15332	ABRE3a
evm.model.Chr03.15332	ARE
evm.model.Chr03.15332	CAT-box
evm.model.Chr03.15332	TCA-element
evm.model.Chr03.15332	Sp1
evm.model.Chr03.17157	O2-site
evm.model.Chr03.17157	ARE
evm.model.Chr03.17157	ABRE3a
evm.model.Chr03.17157	Box 4
evm.model.Chr03.17157	Box 4
evm.model.Chr03.17157	Box 4
evm.model.Chr03.17157	Box 4
evm.model.Chr03.17157	Box 4
evm.model.Chr03.17157	Box 4
evm.model.Chr03.17157	Box 4
evm.model.Chr03.17157	CGTCA-motif
evm.model.Chr03.17157	Sp1
evm.model.Chr03.17157	CAT-box
evm.model.Chr03.17157	CAT-box
evm.model.Chr03.17157	CAT-box
evm.model.Chr03.17157	G-box
evm.model.Chr03.17157	G-box
evm.model.Chr03.17157	TGA-element
evm.model.Chr03.17157	TGA-element
evm.model.Chr03.17157	TGA-element
evm.model.Chr03.17157	circadian
evm.model.Chr03.17157	ABRE4
evm.model.Chr03.17157	MBS
evm.model.Chr03.17157	ABRE
evm.model.Chr03.17157	ABRE
evm.model.Chr03.17157	ABRE
evm.model.Chr03.17157	TCA
evm.model.Chr03.17157	G-Box
evm.model.Chr03.17157	GT1-motif
evm.model.Chr03.17157	GT1-motif
evm.model.Chr03.17158	ARE
evm.model.Chr03.17158	ARE
evm.model.Chr03.17158	ARE
evm.model.Chr03.17158	ARE
evm.model.Chr03.17158	ARE
evm.model.Chr03.17158	O2-site
evm.model.Chr03.17158	O2-site
evm.model.Chr03.17158	CGTCA-motif
evm.model.Chr03.17158	Box 4
evm.model.Chr03.17158	Box 4
evm.model.Chr03.17158	ABRE
evm.model.Chr03.17158	ABRE
evm.model.Chr03.17158	GT1-motif
evm.model.Chr03.17158	GT1-motif
evm.model.Chr03.17158	GT1-motif
evm.model.Chr03.17158	GT1-motif
evm.model.Chr03.17158	G-Box
evm.model.Chr03.17158	G-box
evm.model.Chr03.18852	G-box
evm.model.Chr03.18852	G-box
evm.model.Chr03.18852	G-Box
evm.model.Chr03.18852	GT1-motif
evm.model.Chr03.18852	GT1-motif
evm.model.Chr03.18852	ABRE
evm.model.Chr03.18852	ABRE
evm.model.Chr03.18852	ABRE
evm.model.Chr03.18852	GATA-motif
evm.model.Chr03.18852	Box 4
evm.model.Chr03.18852	Box 4
evm.model.Chr03.18852	Box 4
evm.model.Chr03.18852	Box 4
evm.model.Chr03.18852	Box 4
evm.model.Chr03.18852	CGTCA-motif
evm.model.Chr03.18852	CGTCA-motif
evm.model.Chr03.18852	ARE
evm.model.Chr03.18852	ARE
evm.model.Chr03.18852	ARE
evm.model.Chr03.18852	GCN4_motif
evm.model.Chr03.18852	CAT-box
evm.model.Chr03.18852	Sp1
evm.model.Chr03.18852	Sp1
evm.model.Chr03.18852	Sp1
evm.model.Chr03.18852	GC-motif
evm.model.Chr03.18852	GC-motif
evm.model.Chr03.18852	GC-motif
evm.model.Chr03.18852	TC-rich repeats
evm.model.Chr03.2227	GT1-motif
evm.model.Chr03.2227	GT1-motif
evm.model.Chr03.2227	GT1-motif
evm.model.Chr03.2227	ABRE
evm.model.Chr03.2227	ABRE
evm.model.Chr03.2227	MBS
evm.model.Chr03.2227	ABRE4
evm.model.Chr03.2227	G-box
evm.model.Chr03.2227	G-box
evm.model.Chr03.2227	G-box
evm.model.Chr03.2227	CGTCA-motif
evm.model.Chr03.2227	CGTCA-motif
evm.model.Chr03.2227	Box 4
evm.model.Chr03.2227	ABRE3a
evm.model.Chr03.2227	ARE
evm.model.Chr03.2227	O2-site
evm.model.Chr03.2230	GC-motif
evm.model.Chr03.2230	CGTCA-motif
evm.model.Chr03.2230	CGTCA-motif
evm.model.Chr03.2230	CGTCA-motif
evm.model.Chr03.2230	CGTCA-motif
evm.model.Chr03.2230	CGTCA-motif
evm.model.Chr03.2230	GATA-motif
evm.model.Chr03.2230	GATA-motif
evm.model.Chr03.2230	ABRE3a
evm.model.Chr03.2230	ABRE3a
evm.model.Chr03.2230	ABRE3a
evm.model.Chr03.2230	ABRE3a
evm.model.Chr03.2230	O2-site
evm.model.Chr03.2230	O2-site
evm.model.Chr03.2230	ABRE
evm.model.Chr03.2230	ABRE
evm.model.Chr03.2230	ABRE
evm.model.Chr03.2230	ABRE
evm.model.Chr03.2230	ABRE
evm.model.Chr03.2230	ABRE
evm.model.Chr03.2230	ABRE
evm.model.Chr03.2230	ABRE
evm.model.Chr03.2230	ABRE
evm.model.Chr03.2230	ABRE
evm.model.Chr03.2230	ABRE
evm.model.Chr03.2230	ABRE
evm.model.Chr03.2230	ABRE
evm.model.Chr03.2230	MBS
evm.model.Chr03.2230	ABRE4
evm.model.Chr03.2230	ABRE4
evm.model.Chr03.2230	ABRE4
evm.model.Chr03.2230	ABRE4
evm.model.Chr03.2230	TGA-box
evm.model.Chr03.2230	G-box
evm.model.Chr03.2230	G-box
evm.model.Chr03.2230	G-box
evm.model.Chr03.2230	G-box
evm.model.Chr03.2230	G-box
evm.model.Chr03.2230	G-box
evm.model.Chr03.2230	G-box
evm.model.Chr03.2232	GT1-motif
evm.model.Chr03.2232	GT1-motif
evm.model.Chr03.2232	TCA
evm.model.Chr03.2232	TC-rich repeats
evm.model.Chr03.2232	Sp1
evm.model.Chr03.2232	Sp1
evm.model.Chr03.2232	Sp1
evm.model.Chr03.2232	Sp1
evm.model.Chr03.2232	Sp1
evm.model.Chr03.2232	CAT-box
evm.model.Chr03.2232	CAT-box
evm.model.Chr03.2232	ARE
evm.model.Chr03.2232	ARE
evm.model.Chr03.2232	CGTCA-motif
evm.model.Chr04.11750	GATA-motif
evm.model.Chr04.11750	GATA-motif
evm.model.Chr04.11750	ABRE3a
evm.model.Chr04.11750	CAT-box
evm.model.Chr04.11750	CAT-box
evm.model.Chr04.11750	CAT-box
evm.model.Chr04.11750	TCA-element
evm.model.Chr04.11750	ABRE4
evm.model.Chr04.11750	P-box
evm.model.Chr04.11750	ABRE
evm.model.Chr04.11750	ABRE
evm.model.Chr04.11750	ABRE
evm.model.Chr04.11750	ABRE
evm.model.Chr04.11750	ABRE
evm.model.Chr04.11750	Box 4
evm.model.Chr04.11750	CGTCA-motif
evm.model.Chr04.11750	CGTCA-motif
evm.model.Chr04.11750	CGTCA-motif
evm.model.Chr04.11750	Sp1
evm.model.Chr04.11750	MBS
evm.model.Chr04.11750	MBS
evm.model.Chr04.11750	circadian
evm.model.Chr04.11750	G-box
evm.model.Chr04.11750	G-box
evm.model.Chr04.11750	G-box
evm.model.Chr04.11750	G-box
evm.model.Chr04.11750	G-box
evm.model.Chr04.11750	GT1-motif
evm.model.Chr04.14998	MBS
evm.model.Chr04.14998	ABRE4
evm.model.Chr04.14998	ABRE4
evm.model.Chr04.14998	ABRE4
evm.model.Chr04.14998	ABRE4
evm.model.Chr04.14998	G-box
evm.model.Chr04.14998	G-box
evm.model.Chr04.14998	G-box
evm.model.Chr04.14998	G-box
evm.model.Chr04.14998	G-box
evm.model.Chr04.14998	G-box
evm.model.Chr04.14998	G-box
evm.model.Chr04.14998	G-box
evm.model.Chr04.14998	ABRE
evm.model.Chr04.14998	ABRE
evm.model.Chr04.14998	ABRE
evm.model.Chr04.14998	ABRE
evm.model.Chr04.14998	ABRE
evm.model.Chr04.14998	ABRE
evm.model.Chr04.14998	ABRE
evm.model.Chr04.14998	ABRE
evm.model.Chr04.14998	CGTCA-motif
evm.model.Chr04.14998	CGTCA-motif
evm.model.Chr04.14998	CGTCA-motif
evm.model.Chr04.14998	Box 4
evm.model.Chr04.14998	ARE
evm.model.Chr04.14998	ARE
evm.model.Chr04.14998	ARE
evm.model.Chr04.14998	RY-element
evm.model.Chr04.14998	RY-element
evm.model.Chr04.14998	ABRE3a
evm.model.Chr04.14998	ABRE3a
evm.model.Chr04.14998	ABRE3a
evm.model.Chr04.14998	ABRE3a
evm.model.Chr04.14998	TC-rich repeats
evm.model.Chr04.15498	TC-rich repeats
evm.model.Chr04.15498	CGTCA-motif
evm.model.Chr04.15498	CGTCA-motif
evm.model.Chr04.15498	CGTCA-motif
evm.model.Chr04.15498	ABRE3a
evm.model.Chr04.15498	ARE
evm.model.Chr04.15498	ARE
evm.model.Chr04.15498	GT1-motif
evm.model.Chr04.15498	G-Box
evm.model.Chr04.15498	G-Box
evm.model.Chr04.15498	G-Box
evm.model.Chr04.15498	ABRE
evm.model.Chr04.15498	ABRE
evm.model.Chr04.15498	ABRE
evm.model.Chr04.15498	ABRE
evm.model.Chr04.15498	ABRE
evm.model.Chr04.15498	ABRE
evm.model.Chr04.15498	ABRE
evm.model.Chr04.15498	ABRE4
evm.model.Chr04.15498	ABRE2
evm.model.Chr04.15498	P-box
evm.model.Chr04.15498	G-box
evm.model.Chr04.15498	G-box
evm.model.Chr04.15498	G-box
evm.model.Chr04.15498	G-box
evm.model.Chr04.19365	G-box
evm.model.Chr04.19365	G-box
evm.model.Chr04.19365	G-box
evm.model.Chr04.19365	TGA-box
evm.model.Chr04.19365	TGA-box
evm.model.Chr04.19365	ABRE4
evm.model.Chr04.19365	ABRE
evm.model.Chr04.19365	ABRE
evm.model.Chr04.19365	ABRE
evm.model.Chr04.19365	ABRE
evm.model.Chr04.19365	ABRE
evm.model.Chr04.19365	ABRE
evm.model.Chr04.19365	ABRE
evm.model.Chr04.19365	ABRE
evm.model.Chr04.19365	ABRE
evm.model.Chr04.19365	G-Box
evm.model.Chr04.19365	G-Box
evm.model.Chr04.19365	ABRE3a
evm.model.Chr04.19365	ARE
evm.model.Chr04.19365	ARE
evm.model.Chr04.19365	ARE
evm.model.Chr04.19365	ARE
evm.model.Chr04.19365	Box 4
evm.model.Chr04.19365	Box 4
evm.model.Chr04.19365	Box 4
evm.model.Chr04.19365	Box 4
evm.model.Chr04.19365	CGTCA-motif
evm.model.Chr04.19365	CGTCA-motif
evm.model.Chr04.19365	CGTCA-motif
evm.model.Chr04.19365	CGTCA-motif
evm.model.Chr04.19365	CGTCA-motif
evm.model.Chr04.19365	CGTCA-motif
evm.model.Chr04.19365	CGTCA-motif
evm.model.Chr04.19365	Sp1
evm.model.Chr04.19365	Sp1
evm.model.Chr04.19365	Sp1
evm.model.Chr04.19365	GC-motif
evm.model.Chr04.19365	GC-motif
evm.model.Chr04.19365	GC-motif
evm.model.Chr04.19365	GC-motif
evm.model.Chr04.19365	GC-motif
evm.model.Chr04.19365	CAT-box
evm.model.Chr04.19365	CAT-box
evm.model.Chr04.2319	TCA-element
evm.model.Chr04.2319	O2-site
evm.model.Chr04.2319	O2-site
evm.model.Chr04.2319	ARE
evm.model.Chr04.2319	CGTCA-motif
evm.model.Chr04.2319	TCA
evm.model.Chr04.2319	G-box
evm.model.Chr04.2319	MBS
evm.model.Chr04.2319	MBS
evm.model.Chr04.2319	TGA-element
evm.model.Chr04.2320	GC-motif
evm.model.Chr04.2320	TC-rich repeats
evm.model.Chr04.2320	TCA-element
evm.model.Chr04.2320	TCA-element
evm.model.Chr04.2320	TCA-element
evm.model.Chr04.2320	ARE
evm.model.Chr04.2320	ABRE3a
evm.model.Chr04.2320	CGTCA-motif
evm.model.Chr04.2320	Box 4
evm.model.Chr04.2320	Box 4
evm.model.Chr04.2320	Box 4
evm.model.Chr04.2320	Box 4
evm.model.Chr04.2320	ABRE
evm.model.Chr04.2320	ABRE
evm.model.Chr04.2320	ABRE
evm.model.Chr04.2320	ABRE
evm.model.Chr04.2320	TCA
evm.model.Chr04.2320	GT1-motif
evm.model.Chr04.2320	GT1-motif
evm.model.Chr04.2320	GT1-motif
evm.model.Chr04.2320	GT1-motif
evm.model.Chr04.2320	GT1-motif
evm.model.Chr04.2320	GT1-motif
evm.model.Chr04.2320	G-Box
evm.model.Chr04.2320	G-box
evm.model.Chr04.2320	G-box
evm.model.Chr04.2320	G-box
evm.model.Chr04.2320	MBS
evm.model.Chr04.2320	ABRE4
evm.model.Chr04.2324	TCA-element
evm.model.Chr04.2324	GC-motif
evm.model.Chr04.2324	CAT-box
evm.model.Chr04.2324	CAT-box
evm.model.Chr04.2324	ARE
evm.model.Chr04.2324	ARE
evm.model.Chr04.2324	ARE
evm.model.Chr04.2324	ARE
evm.model.Chr04.2324	Box 4
evm.model.Chr04.2324	CGTCA-motif
evm.model.Chr04.2324	CGTCA-motif
evm.model.Chr04.2324	GT1-motif
evm.model.Chr04.2324	G-box
evm.model.Chr04.2324	MBS
evm.model.Chr05.11883	Box 4
evm.model.Chr05.11883	CGTCA-motif
evm.model.Chr05.11883	CGTCA-motif
evm.model.Chr05.11883	CGTCA-motif
evm.model.Chr05.11883	CGTCA-motif
evm.model.Chr05.11883	CGTCA-motif
evm.model.Chr05.11883	CGTCA-motif
evm.model.Chr05.11883	GATA-motif
evm.model.Chr05.11883	GATA-motif
evm.model.Chr05.11883	ABRE3a
evm.model.Chr05.11883	O2-site
evm.model.Chr05.11883	O2-site
evm.model.Chr05.11883	ARE
evm.model.Chr05.11883	GCN4_motif
evm.model.Chr05.11883	CAT-box
evm.model.Chr05.11883	Sp1
evm.model.Chr05.11883	Sp1
evm.model.Chr05.11883	ABRE4
evm.model.Chr05.11883	MBS
evm.model.Chr05.11883	MBS
evm.model.Chr05.11883	TGA-element
evm.model.Chr05.11883	G-box
evm.model.Chr05.11883	G-box
evm.model.Chr05.11883	G-box
evm.model.Chr05.11883	G-box
evm.model.Chr05.11883	G-box
evm.model.Chr05.11883	G-box
evm.model.Chr05.11883	G-box
evm.model.Chr05.11883	G-box
evm.model.Chr05.11883	G-box
evm.model.Chr05.11883	G-Box
evm.model.Chr05.11883	G-Box
evm.model.Chr05.11883	GT1-motif
evm.model.Chr05.11883	ABRE
evm.model.Chr05.11883	ABRE
evm.model.Chr05.11883	ABRE
evm.model.Chr05.11883	ABRE
evm.model.Chr05.11883	ABRE
evm.model.Chr05.11883	ABRE
evm.model.Chr05.11883	ABRE
evm.model.Chr05.11883	ABRE
evm.model.Chr05.11883	ABRE
evm.model.Chr05.21261	ABRE3a
evm.model.Chr05.21261	ARE
evm.model.Chr05.21261	ARE
evm.model.Chr05.21261	ARE
evm.model.Chr05.21261	Box 4
evm.model.Chr05.21261	Box 4
evm.model.Chr05.21261	CGTCA-motif
evm.model.Chr05.21261	CGTCA-motif
evm.model.Chr05.21261	CGTCA-motif
evm.model.Chr05.21261	CGTCA-motif
evm.model.Chr05.21261	GATA-motif
evm.model.Chr05.21261	G-box
evm.model.Chr05.21261	G-box
evm.model.Chr05.21261	G-box
evm.model.Chr05.21261	ABRE4
evm.model.Chr05.21261	MBS
evm.model.Chr05.21261	MBS
evm.model.Chr05.21261	MBS
evm.model.Chr05.21261	P-box
evm.model.Chr05.21261	TGA-element
evm.model.Chr05.21261	ABRE
evm.model.Chr05.21264	RY-element
evm.model.Chr05.21264	RY-element
evm.model.Chr05.21264	ARE
evm.model.Chr05.21264	ARE
evm.model.Chr05.21264	ARE
evm.model.Chr05.21264	ARE
evm.model.Chr05.21264	ARE
evm.model.Chr05.21264	O2-site
evm.model.Chr05.21264	O2-site
evm.model.Chr05.21264	CGTCA-motif
evm.model.Chr05.21264	CGTCA-motif
evm.model.Chr05.21264	CGTCA-motif
evm.model.Chr05.21264	Box 4
evm.model.Chr05.21264	Box 4
evm.model.Chr05.21264	GATA-motif
evm.model.Chr05.21264	TCA-element
evm.model.Chr05.21264	TCA-element
evm.model.Chr05.21264	G-box
evm.model.Chr05.21264	G-box
evm.model.Chr05.21264	G-box
evm.model.Chr05.21264	G-box
evm.model.Chr05.21264	G-box
evm.model.Chr05.21264	G-box
evm.model.Chr05.21264	P-box
evm.model.Chr05.21264	P-box
evm.model.Chr05.21264	MBS
evm.model.Chr05.21264	MBS
evm.model.Chr05.21264	ABRE
evm.model.Chr05.21264	ABRE
evm.model.Chr05.21264	ABRE
evm.model.Chr05.21264	ABRE
evm.model.Chr05.21264	ABRE
evm.model.Chr05.21264	ABRE
evm.model.Chr05.21264	ABRE
evm.model.Chr05.21264	ABRE
evm.model.Chr05.21264	G-Box
evm.model.Chr05.21264	G-Box
evm.model.Chr05.21264	G-Box
evm.model.Chr05.2854	Sp1
evm.model.Chr05.2854	Sp1
evm.model.Chr05.2854	Sp1
evm.model.Chr05.2854	TCA-element
evm.model.Chr05.2854	TCA-element
evm.model.Chr05.2854	TCA-element
evm.model.Chr05.2854	CAT-box
evm.model.Chr05.2854	RY-element
evm.model.Chr05.2854	RY-element
evm.model.Chr05.2854	RY-element
evm.model.Chr05.2854	ARE
evm.model.Chr05.2854	CGTCA-motif
evm.model.Chr05.2854	CGTCA-motif
evm.model.Chr05.5649	CGTCA-motif
evm.model.Chr05.5649	GATA-motif
evm.model.Chr05.5649	ARE
evm.model.Chr05.5649	ARE
evm.model.Chr05.5649	ARE
evm.model.Chr05.5649	TC-rich repeats
evm.model.Chr05.5649	TC-rich repeats
evm.model.Chr05.5649	GC-motif
evm.model.Chr05.5649	Sp1
evm.model.Chr05.5649	Sp1
evm.model.Chr05.5649	Sp1
evm.model.Chr05.5649	P-box
evm.model.Chr05.5649	G-box
evm.model.Chr05.5649	G-box
evm.model.Chr05.5649	G-box
evm.model.Chr05.5649	G-Box
evm.model.Chr05.5649	ABRE
evm.model.Chr05.5649	ABRE
evm.model.Chr05.6228	TC-rich repeats
evm.model.Chr05.6228	ARE
evm.model.Chr05.6228	ARE
evm.model.Chr05.6228	ARE
evm.model.Chr05.6228	ARE
evm.model.Chr05.6228	ARE
evm.model.Chr05.6228	ABRE3a
evm.model.Chr05.6228	Box 4
evm.model.Chr05.6228	CGTCA-motif
evm.model.Chr05.6228	CGTCA-motif
evm.model.Chr05.6228	CGTCA-motif
evm.model.Chr05.6228	CGTCA-motif
evm.model.Chr05.6228	CGTCA-motif
evm.model.Chr05.6228	CGTCA-motif
evm.model.Chr05.6228	ABRE
evm.model.Chr05.6228	ABRE
evm.model.Chr05.6228	ABRE
evm.model.Chr05.6228	G-box
evm.model.Chr05.6228	G-box
evm.model.Chr05.6228	G-box
evm.model.Chr05.6228	ABRE4
evm.model.Chr05.6228	MBS
evm.model.Chr05.6228	TGA-box
evm.model.Chr05.6232	ABRE
evm.model.Chr05.6232	ABRE
evm.model.Chr05.6232	ABRE
evm.model.Chr05.6232	ABRE
evm.model.Chr05.6232	ABRE
evm.model.Chr05.6232	G-Box
evm.model.Chr05.6232	GT1-motif
evm.model.Chr05.6232	G-box
evm.model.Chr05.6232	G-box
evm.model.Chr05.6232	G-box
evm.model.Chr05.6232	G-box
evm.model.Chr05.6232	G-box
evm.model.Chr05.6232	ABRE4
evm.model.Chr05.6232	MBS
evm.model.Chr05.6232	P-box
evm.model.Chr05.6232	P-box
evm.model.Chr05.6232	GC-motif
evm.model.Chr05.6232	Sp1
evm.model.Chr05.6232	Sp1
evm.model.Chr05.6232	ABRE3a
evm.model.Chr05.6232	ARE
evm.model.Chr05.6232	ARE
evm.model.Chr05.6232	CGTCA-motif
evm.model.Chr05.6232	CGTCA-motif
evm.model.Chr05.6232	GATA-motif
evm.model.Chr05.7172.2	Box 4
evm.model.Chr05.7172.2	Box 4
evm.model.Chr05.7172.2	CGTCA-motif
evm.model.Chr05.7172.2	CGTCA-motif
evm.model.Chr05.7172.2	CGTCA-motif
evm.model.Chr05.7172.2	GATA-motif
evm.model.Chr05.7172.2	ABRE3a
evm.model.Chr05.7172.2	ABRE3a
evm.model.Chr05.7172.2	ARE
evm.model.Chr05.7172.2	ARE
evm.model.Chr05.7172.2	ARE
evm.model.Chr05.7172.2	TC-rich repeats
evm.model.Chr05.7172.2	Sp1
evm.model.Chr05.7172.2	Sp1
evm.model.Chr05.7172.2	Sp1
evm.model.Chr05.7172.2	Sp1
evm.model.Chr05.7172.2	Sp1
evm.model.Chr05.7172.2	Sp1
evm.model.Chr05.7172.2	ABRE4
evm.model.Chr05.7172.2	ABRE4
evm.model.Chr05.7172.2	MBS
evm.model.Chr05.7172.2	G-box
evm.model.Chr05.7172.2	G-box
evm.model.Chr05.7172.2	G-box
evm.model.Chr05.7172.2	G-box
evm.model.Chr05.7172.2	G-box
evm.model.Chr05.7172.2	G-Box
evm.model.Chr05.7172.2	GT1-motif
evm.model.Chr05.7172.2	GT1-motif
evm.model.Chr05.7172.2	GT1-motif
evm.model.Chr05.7172.2	TCA
evm.model.Chr05.7172.2	ABRE
evm.model.Chr05.7172.2	ABRE
evm.model.Chr05.7172.2	ABRE
evm.model.Chr05.7172.2	ABRE
evm.model.Chr05.7172.2	ABRE
evm.model.Chr05.7172.2	ABRE
evm.model.Chr05.7172.2	ABRE
evm.model.Chr05.7172.2	ABRE
evm.model.Chr06.1025	G-box
evm.model.Chr06.1025	G-box
evm.model.Chr06.1025	G-box
evm.model.Chr06.1025	G-box
evm.model.Chr06.1025	G-box
evm.model.Chr06.1025	G-box
evm.model.Chr06.1025	G-box
evm.model.Chr06.1025	ABRE4
evm.model.Chr06.1025	ABRE
evm.model.Chr06.1025	ABRE
evm.model.Chr06.1025	ABRE
evm.model.Chr06.1025	ABRE
evm.model.Chr06.1025	ABRE
evm.model.Chr06.1025	ABRE
evm.model.Chr06.1025	ABRE
evm.model.Chr06.1025	ABRE
evm.model.Chr06.1025	ABRE
evm.model.Chr06.1025	ABRE
evm.model.Chr06.1025	ABRE
evm.model.Chr06.1025	G-Box
evm.model.Chr06.1025	G-Box
evm.model.Chr06.1025	G-Box
evm.model.Chr06.1025	ABRE3a
evm.model.Chr06.1025	CGTCA-motif
evm.model.Chr06.1025	CGTCA-motif
evm.model.Chr06.1025	Box 4
evm.model.Chr06.1025	Box 4
evm.model.Chr06.1025	Box 4
evm.model.Chr06.1025	Sp1
evm.model.Chr06.1025	TCA-element
evm.model.Chr06.1025	CAT-box
evm.model.Chr06.20965	Box 4
evm.model.Chr06.20965	Box 4
evm.model.Chr06.20965	Box 4
evm.model.Chr06.20965	Box 4
evm.model.Chr06.20965	Box 4
evm.model.Chr06.20965	CGTCA-motif
evm.model.Chr06.20965	CGTCA-motif
evm.model.Chr06.20965	ARE
evm.model.Chr06.20965	ARE
evm.model.Chr06.20965	ABRE3a
evm.model.Chr06.20965	CAT-box
evm.model.Chr06.20965	TCA-element
evm.model.Chr06.20965	TGA-element
evm.model.Chr06.20965	P-box
evm.model.Chr06.20965	ABRE4
evm.model.Chr06.20965	MBS
evm.model.Chr06.20965	MBS
evm.model.Chr06.20965	MBS
evm.model.Chr06.20965	G-box
evm.model.Chr06.20965	G-box
evm.model.Chr06.20965	G-box
evm.model.Chr06.20965	G-box
evm.model.Chr06.20965	G-Box
evm.model.Chr06.20965	G-Box
evm.model.Chr06.20965	GT1-motif
evm.model.Chr06.20965	GT1-motif
evm.model.Chr06.20965	ABRE
evm.model.Chr06.20965	ABRE
evm.model.Chr06.20965	ABRE
evm.model.Chr06.20965	ABRE
evm.model.Chr06.20966	Box 4
evm.model.Chr06.20966	Box 4
evm.model.Chr06.20966	Box 4
evm.model.Chr06.20966	Box 4
evm.model.Chr06.20966	Box 4
evm.model.Chr06.20966	CGTCA-motif
evm.model.Chr06.20966	CGTCA-motif
evm.model.Chr06.20966	CAT-box
evm.model.Chr06.20966	GC-motif
evm.model.Chr06.20966	GC-motif
evm.model.Chr06.20966	TCA-element
evm.model.Chr06.20966	P-box
evm.model.Chr06.20966	ABRE2
evm.model.Chr06.20966	MBS
evm.model.Chr06.20966	MBS
evm.model.Chr06.20966	G-box
evm.model.Chr06.20966	G-box
evm.model.Chr06.20966	G-box
evm.model.Chr06.20966	TCA
evm.model.Chr06.20966	G-Box
evm.model.Chr06.20966	G-Box
evm.model.Chr06.20966	ABRE
evm.model.Chr06.20966	ABRE
evm.model.Chr06.20966	ABRE
evm.model.Chr06.20966	ABRE
evm.model.Chr06.20966	ABRE
evm.model.Chr06.20967	GT1-motif
evm.model.Chr06.20967	GT1-motif
evm.model.Chr06.20967	G-Box
evm.model.Chr06.20967	G-Box
evm.model.Chr06.20967	ABRE
evm.model.Chr06.20967	ABRE
evm.model.Chr06.20967	ABRE
evm.model.Chr06.20967	ABRE
evm.model.Chr06.20967	ABRE
evm.model.Chr06.20967	ABRE
evm.model.Chr06.20967	ABRE
evm.model.Chr06.20967	ABRE
evm.model.Chr06.20967	ABRE
evm.model.Chr06.20967	ABRE
evm.model.Chr06.20967	ABRE
evm.model.Chr06.20967	ABRE
evm.model.Chr06.20967	TGA-element
evm.model.Chr06.20967	TGA-element
evm.model.Chr06.20967	MBS
evm.model.Chr06.20967	MBS
evm.model.Chr06.20967	MBS
evm.model.Chr06.20967	MBS
evm.model.Chr06.20967	ABRE4
evm.model.Chr06.20967	ABRE4
evm.model.Chr06.20967	ABRE4
evm.model.Chr06.20967	ABRE4
evm.model.Chr06.20967	ABRE4
evm.model.Chr06.20967	P-box
evm.model.Chr06.20967	P-box
evm.model.Chr06.20967	G-box
evm.model.Chr06.20967	G-box
evm.model.Chr06.20967	G-box
evm.model.Chr06.20967	G-box
evm.model.Chr06.20967	G-box
evm.model.Chr06.20967	G-box
evm.model.Chr06.20967	G-box
evm.model.Chr06.20967	G-box
evm.model.Chr06.20967	G-box
evm.model.Chr06.20967	G-box
evm.model.Chr06.20967	G-box
evm.model.Chr06.20967	CAT-box
evm.model.Chr06.20967	CAT-box
evm.model.Chr06.20967	GC-motif
evm.model.Chr06.20967	GC-motif
evm.model.Chr06.20967	Sp1
evm.model.Chr06.20967	Sp1
evm.model.Chr06.20967	GATA-motif
evm.model.Chr06.20967	CGTCA-motif
evm.model.Chr06.20967	CGTCA-motif
evm.model.Chr06.20967	CGTCA-motif
evm.model.Chr06.20967	CGTCA-motif
evm.model.Chr06.20967	Box 4
evm.model.Chr06.20967	Box 4
evm.model.Chr06.20967	ARE
evm.model.Chr06.20967	RY-element
evm.model.Chr06.20967	ABRE3a
evm.model.Chr06.20967	ABRE3a
evm.model.Chr06.20967	ABRE3a
evm.model.Chr06.20967	ABRE3a
evm.model.Chr06.20967	ABRE3a
evm.model.Chr06.3708	G-box
evm.model.Chr06.3708	G-box
evm.model.Chr06.3708	G-box
evm.model.Chr06.3708	G-box
evm.model.Chr06.3708	G-box
evm.model.Chr06.3708	G-box
evm.model.Chr06.3708	G-box
evm.model.Chr06.3708	G-box
evm.model.Chr06.3708	TGA-element
evm.model.Chr06.3708	P-box
evm.model.Chr06.3708	ABRE4
evm.model.Chr06.3708	ABRE4
evm.model.Chr06.3708	ABRE4
evm.model.Chr06.3708	ABRE4
evm.model.Chr06.3708	ABRE
evm.model.Chr06.3708	ABRE
evm.model.Chr06.3708	ABRE
evm.model.Chr06.3708	ABRE
evm.model.Chr06.3708	ABRE
evm.model.Chr06.3708	ABRE
evm.model.Chr06.3708	ABRE
evm.model.Chr06.3708	ABRE
evm.model.Chr06.3708	ABRE
evm.model.Chr06.3708	ABRE
evm.model.Chr06.3708	ABRE
evm.model.Chr06.3708	ABRE
evm.model.Chr06.3708	ABRE
evm.model.Chr06.3708	ABRE
evm.model.Chr06.3708	GT1-motif
evm.model.Chr06.3708	G-Box
evm.model.Chr06.3708	G-Box
evm.model.Chr06.3708	RY-element
evm.model.Chr06.3708	ARE
evm.model.Chr06.3708	ABRE3a
evm.model.Chr06.3708	ABRE3a
evm.model.Chr06.3708	ABRE3a
evm.model.Chr06.3708	ABRE3a
evm.model.Chr06.3708	CGTCA-motif
evm.model.Chr06.3708	CGTCA-motif
evm.model.Chr06.3708	CGTCA-motif
evm.model.Chr06.3708	CGTCA-motif
evm.model.Chr06.3708	Sp1
evm.model.Chr06.3708	TCA-element
evm.model.Chr06.6611	ARE
evm.model.Chr06.6611	ABRE3a
evm.model.Chr06.6611	ABRE3a
evm.model.Chr06.6611	GATA-motif
evm.model.Chr06.6611	Box 4
evm.model.Chr06.6611	Sp1
evm.model.Chr06.6611	Sp1
evm.model.Chr06.6611	Sp1
evm.model.Chr06.6611	CAT-box
evm.model.Chr06.6611	CAT-box
evm.model.Chr06.6611	CAT-box
evm.model.Chr06.6611	CAT-box
evm.model.Chr06.6611	G-box
evm.model.Chr06.6611	G-box
evm.model.Chr06.6611	G-box
evm.model.Chr06.6611	G-box
evm.model.Chr06.6611	G-box
evm.model.Chr06.6611	G-box
evm.model.Chr06.6611	ABRE4
evm.model.Chr06.6611	ABRE4
evm.model.Chr06.6611	MBS
evm.model.Chr06.6611	ABRE
evm.model.Chr06.6611	ABRE
evm.model.Chr06.6611	ABRE
evm.model.Chr06.6611	ABRE
evm.model.Chr06.6611	G-Box
evm.model.Chr06.7185	O2-site
evm.model.Chr06.7185	ARE
evm.model.Chr06.7185	Box 4
evm.model.Chr06.7185	Box 4
evm.model.Chr06.7185	GC-motif
evm.model.Chr06.7185	TCA-element
evm.model.Chr06.7185	CAT-box
evm.model.Chr06.7185	TGA-element
evm.model.Chr06.7185	MBS
evm.model.Chr06.7185	P-box
evm.model.Chr06.7185	P-box
evm.model.Chr06.7185	ABRE
evm.model.Chr06.7185	ABRE
evm.model.Chr06.7185	G-Box
evm.model.Chr06.7185	GT1-motif
evm.model.Chr06.7186	Sp1
evm.model.Chr06.7186	GC-motif
evm.model.Chr06.7186	TCA-element
evm.model.Chr06.7186	Box 4
evm.model.Chr06.7186	CGTCA-motif
evm.model.Chr06.7186	CGTCA-motif
evm.model.Chr06.7186	ARE
evm.model.Chr06.7186	ARE
evm.model.Chr06.7186	ARE
evm.model.Chr06.7186	ARE
evm.model.Chr06.7186	ABRE3a
evm.model.Chr06.7186	ABRE3a
evm.model.Chr06.7186	GT1-motif
evm.model.Chr06.7186	ABRE
evm.model.Chr06.7186	ABRE
evm.model.Chr06.7186	ABRE
evm.model.Chr06.7186	P-box
evm.model.Chr06.7186	ABRE4
evm.model.Chr06.7186	ABRE4
evm.model.Chr06.7186	MBS
evm.model.Chr06.7186	G-box
evm.model.Chr06.7186	G-box
evm.model.Chr06.7186	G-box
evm.model.Chr06.8224	CAT-box
evm.model.Chr06.8224	GC-motif
evm.model.Chr06.8224	GC-motif
evm.model.Chr06.8224	ABRE3a
evm.model.Chr06.8224	ARE
evm.model.Chr06.8224	ABRE
evm.model.Chr06.8224	ABRE
evm.model.Chr06.8224	ABRE
evm.model.Chr06.8224	ABRE4
evm.model.Chr06.8224	GCN4_motif
evm.model.Chr06.8224	TC-rich repeats
evm.model.Chr06.8224	TC-rich repeats
evm.model.Chr06.8224	Sp1
evm.model.Chr06.8224	CGTCA-motif
evm.model.Chr06.8224	CGTCA-motif
evm.model.Chr06.8224	CGTCA-motif
evm.model.Chr06.8224	Box 4
evm.model.Chr06.8224	Box 4
evm.model.Chr06.8224	Box 4
evm.model.Chr06.8224	O2-site
evm.model.Chr06.8224	G-Box
evm.model.Chr06.8224	TCA
evm.model.Chr06.8224	circadian
evm.model.Chr06.8224	G-box
evm.model.Chr06.8224	G-box
evm.model.Chr06.8224	G-box
evm.model.Chr07.17266	G-Box
evm.model.Chr07.17266	ABRE
evm.model.Chr07.17266	ABRE
evm.model.Chr07.17266	G-box
evm.model.Chr07.17266	G-box
evm.model.Chr07.17266	MBSI
evm.model.Chr07.17266	GC-motif
evm.model.Chr07.17266	GC-motif
evm.model.Chr07.17266	CGTCA-motif
evm.model.Chr07.17266	ARE
evm.model.Chr07.17266	ARE
evm.model.Chr07.17266	ARE
evm.model.Chr07.17266	O2-site
evm.model.Chr07.17266	O2-site
evm.model.Chr07.2436	CGTCA-motif
evm.model.Chr07.2436	CGTCA-motif
evm.model.Chr07.2436	CGTCA-motif
evm.model.Chr07.2436	GATA-motif
evm.model.Chr07.2436	GATA-motif
evm.model.Chr07.2436	ARE
evm.model.Chr07.2436	CAT-box
evm.model.Chr07.2436	TCA-element
evm.model.Chr07.2436	TCA-element
evm.model.Chr07.2436	TCA-element
evm.model.Chr07.2436	TC-rich repeats
evm.model.Chr07.2436	TC-rich repeats
evm.model.Chr07.2436	Sp1
evm.model.Chr07.2436	Sp1
evm.model.Chr07.2436	G-box
evm.model.Chr07.2436	G-box
evm.model.Chr07.2436	G-box
evm.model.Chr07.2436	G-box
evm.model.Chr07.2436	G-box
evm.model.Chr07.2436	G-box
evm.model.Chr07.2436	G-box
evm.model.Chr07.2436	G-Box
evm.model.Chr07.2436	G-Box
evm.model.Chr07.2436	ABRE
evm.model.Chr07.2436	ABRE
evm.model.Chr07.2436	ABRE
evm.model.Chr07.2436	ABRE
evm.model.Chr07.2436	ABRE
evm.model.Chr07.2436	ABRE
evm.model.Chr07.2436	ABRE
evm.model.Chr07.2436	ABRE
evm.model.Chr07.301	TCA
evm.model.Chr07.301	TCA
evm.model.Chr07.301	GT1-motif
evm.model.Chr07.301	ABRE
evm.model.Chr07.301	ABRE
evm.model.Chr07.301	TGA-element
evm.model.Chr07.301	TGA-element
evm.model.Chr07.301	MBS
evm.model.Chr07.301	G-box
evm.model.Chr07.301	G-box
evm.model.Chr07.301	CAT-box
evm.model.Chr07.301	CAT-box
evm.model.Chr07.301	Sp1
evm.model.Chr07.301	Sp1
evm.model.Chr07.301	Sp1
evm.model.Chr07.301	CGTCA-motif
evm.model.Chr07.301	CGTCA-motif
evm.model.Chr07.301	CGTCA-motif
evm.model.Chr07.301	CGTCA-motif
evm.model.Chr07.301	ARE
evm.model.Chr07.301	ARE
evm.model.Chr07.301	O2-site
evm.model.Chr07.302	MBS
evm.model.Chr07.302	MBS
evm.model.Chr07.302	TGA-element
evm.model.Chr07.302	TGA-element
evm.model.Chr07.302	G-box
evm.model.Chr07.302	GT1-motif
evm.model.Chr07.302	TCA
evm.model.Chr07.302	TCA
evm.model.Chr07.302	TCA
evm.model.Chr07.302	CGTCA-motif
evm.model.Chr07.302	ARE
evm.model.Chr07.302	ARE
evm.model.Chr07.302	ARE
evm.model.Chr07.302	O2-site
evm.model.Chr07.302	CAT-box
evm.model.Chr07.302	CAT-box
evm.model.Chr07.302	CAT-box
evm.model.Chr07.302	Sp1
evm.model.Chr07.310	MBS
evm.model.Chr07.310	MBS
evm.model.Chr07.310	P-box
evm.model.Chr07.310	TCA
evm.model.Chr07.310	ARE
evm.model.Chr07.310	ARE
evm.model.Chr07.310	ARE
evm.model.Chr07.310	Box 4
evm.model.Chr07.310	Box 4
evm.model.Chr07.310	TCA-element
evm.model.Chr07.310	GCN4_motif
evm.model.Chr07.310	CAT-box
evm.model.Chr07.6241	CAT-box
evm.model.Chr07.6241	CAT-box
evm.model.Chr07.6241	GC-motif
evm.model.Chr07.6241	Sp1
evm.model.Chr07.6241	Sp1
evm.model.Chr07.6241	Sp1
evm.model.Chr07.6241	CGTCA-motif
evm.model.Chr07.6241	CGTCA-motif
evm.model.Chr07.6241	CGTCA-motif
evm.model.Chr07.6241	CGTCA-motif
evm.model.Chr07.6241	CGTCA-motif
evm.model.Chr07.6241	CGTCA-motif
evm.model.Chr07.6241	CGTCA-motif
evm.model.Chr07.6241	MSA-like
evm.model.Chr07.6241	O2-site
evm.model.Chr07.6241	ARE
evm.model.Chr07.6241	G-Box
evm.model.Chr07.6241	GT1-motif
evm.model.Chr07.6241	TCA
evm.model.Chr07.6241	ABRE
evm.model.Chr07.6241	ABRE
evm.model.Chr07.6241	ABRE
evm.model.Chr07.6241	P-box
evm.model.Chr07.6241	P-box
evm.model.Chr07.6241	G-box
evm.model.Chr07.6241	G-box
evm.model.Chr07.6241	G-box
evm.model.Chr07.792	CGTCA-motif
evm.model.Chr07.792	CGTCA-motif
evm.model.Chr07.792	Box 4
evm.model.Chr07.792	O2-site
evm.model.Chr07.792	ABRE3a
evm.model.Chr07.792	ABRE3a
evm.model.Chr07.792	CAT-box
evm.model.Chr07.792	TCA-element
evm.model.Chr07.792	TGA-element
evm.model.Chr07.792	ABRE4
evm.model.Chr07.792	ABRE4
evm.model.Chr07.792	G-box
evm.model.Chr07.792	G-box
evm.model.Chr07.792	G-box
evm.model.Chr07.792	G-box
evm.model.Chr07.792	GT1-motif
evm.model.Chr07.792	G-Box
evm.model.Chr07.792	G-Box
evm.model.Chr07.792	G-Box
evm.model.Chr07.792	ABRE
evm.model.Chr07.792	ABRE
evm.model.Chr07.792	ABRE
evm.model.Chr07.792	ABRE
evm.model.Chr07.792	ABRE
evm.model.Chr07.792	ABRE
evm.model.Chr07.792	ABRE
evm.model.Chr07.792	ABRE
evm.model.Chr07.792	ABRE
evm.model.Chr08.16445	GC-motif
evm.model.Chr08.16445	ARE
evm.model.Chr08.16445	ARE
evm.model.Chr08.16445	GATA-motif
evm.model.Chr08.16445	CGTCA-motif
evm.model.Chr08.16445	ABRE
evm.model.Chr08.16445	ABRE
evm.model.Chr08.16445	ABRE
evm.model.Chr08.16445	G-Box
evm.model.Chr08.16445	G-box
evm.model.Chr08.16445	G-box
evm.model.Chr08.2682	GATA-motif
evm.model.Chr08.2682	CGTCA-motif
evm.model.Chr08.2682	CGTCA-motif
evm.model.Chr08.2682	CGTCA-motif
evm.model.Chr08.2682	CGTCA-motif
evm.model.Chr08.2682	ABRE3a
evm.model.Chr08.2682	CAT-box
evm.model.Chr08.2682	CAT-box
evm.model.Chr08.2682	CAT-box
evm.model.Chr08.2682	MBSI
evm.model.Chr08.2682	GC-motif
evm.model.Chr08.2682	Sp1
evm.model.Chr08.2682	Sp1
evm.model.Chr08.2682	Sp1
evm.model.Chr08.2682	TCA-element
evm.model.Chr08.2682	TCA-element
evm.model.Chr08.2682	TC-rich repeats
evm.model.Chr08.2682	ABRE4
evm.model.Chr08.2682	G-box
evm.model.Chr08.2682	G-box
evm.model.Chr08.2682	G-box
evm.model.Chr08.2682	G-box
evm.model.Chr08.2682	G-box
evm.model.Chr08.2682	TCA
evm.model.Chr08.2682	G-Box
evm.model.Chr08.2682	ABRE
evm.model.Chr08.2682	ABRE
evm.model.Chr08.2682	ABRE
evm.model.Chr08.2682	ABRE
evm.model.Chr08.2682	ABRE
evm.model.Chr08.2682	ABRE
evm.model.Chr08.538	ABRE
evm.model.Chr08.538	GT1-motif
evm.model.Chr08.538	MBS
evm.model.Chr08.538	MBS
evm.model.Chr08.538	TCA-element
evm.model.Chr08.538	TCA-element
evm.model.Chr08.538	TC-rich repeats
evm.model.Chr08.538	TC-rich repeats
evm.model.Chr08.538	TC-rich repeats
evm.model.Chr08.538	TC-rich repeats
evm.model.Chr08.538	GC-motif
evm.model.Chr08.538	CAT-box
evm.model.Chr08.538	O2-site
evm.model.Chr08.538	O2-site
evm.model.Chr08.538	ARE
evm.model.Chr08.538	RY-element
evm.model.Chr08.538	Box 4
evm.model.Chr08.539	CAT-box
evm.model.Chr08.539	CAT-box
evm.model.Chr08.539	GC-motif
evm.model.Chr08.539	GC-motif
evm.model.Chr08.539	Sp1
evm.model.Chr08.539	CGTCA-motif
evm.model.Chr08.539	GATA-motif
evm.model.Chr08.539	O2-site
evm.model.Chr08.539	O2-site
evm.model.Chr08.539	O2-site
evm.model.Chr08.539	ARE
evm.model.Chr08.539	ARE
evm.model.Chr08.6673	Box 4
evm.model.Chr08.6673	Box 4
evm.model.Chr08.6673	CGTCA-motif
evm.model.Chr08.6673	CGTCA-motif
evm.model.Chr08.6673	CGTCA-motif
evm.model.Chr08.6673	CGTCA-motif
evm.model.Chr08.6673	CGTCA-motif
evm.model.Chr08.6673	GC-motif
evm.model.Chr08.6673	GC-motif
evm.model.Chr08.6673	GC-motif
evm.model.Chr08.6673	TGA-element
evm.model.Chr08.6673	TGA-element
evm.model.Chr08.6673	G-box
evm.model.Chr08.6673	G-box
evm.model.Chr08.6673	G-box
evm.model.Chr08.6673	G-box
evm.model.Chr08.6673	G-box
evm.model.Chr08.6673	G-box
evm.model.Chr08.6673	ABRE
evm.model.Chr08.6673	ABRE
evm.model.Chr08.6673	ABRE
evm.model.Chr08.6673	ABRE
evm.model.Chr08.6673	ABRE
evm.model.Chr08.6673	ABRE
evm.model.Chr08.797	TCA-element
evm.model.Chr08.797	GC-motif
evm.model.Chr08.797	CAT-box
evm.model.Chr08.797	ARE
evm.model.Chr08.797	O2-site
evm.model.Chr08.797	CGTCA-motif
evm.model.Chr08.797	CGTCA-motif
evm.model.Chr08.797	CGTCA-motif
evm.model.Chr08.797	Box 4
evm.model.Chr08.797	GATA-motif
evm.model.Chr08.797	GATA-motif
evm.model.Chr08.797	ABRE
evm.model.Chr08.797	ABRE
evm.model.Chr08.797	ABRE
evm.model.Chr08.797	ABRE
evm.model.Chr08.797	ABRE
evm.model.Chr08.797	GT1-motif
evm.model.Chr08.797	TCA
evm.model.Chr08.797	G-box
evm.model.Chr08.797	G-box
evm.model.Chr08.797	TGA-element
evm.model.Chr09.15553	GT1-motif
evm.model.Chr09.15553	G-Box
evm.model.Chr09.15553	G-Box
evm.model.Chr09.15553	ABRE
evm.model.Chr09.15553	ABRE
evm.model.Chr09.15553	ABRE
evm.model.Chr09.15553	ABRE
evm.model.Chr09.15553	TGA-element
evm.model.Chr09.15553	TGA-element
evm.model.Chr09.15553	G-box
evm.model.Chr09.15553	G-box
evm.model.Chr09.15553	TCA-element
evm.model.Chr09.15553	TCA-element
evm.model.Chr09.15553	CGTCA-motif
evm.model.Chr09.15553	CGTCA-motif
evm.model.Chr09.15553	CGTCA-motif
evm.model.Chr09.15553	Box 4
evm.model.Chr09.15553	ARE
evm.model.Chr09.15553	ARE
evm.model.Chr09.15553	ARE
evm.model.Chr09.15553	O2-site
evm.model.Chr09.15553	MSA-like
evm.model.Chr09.15558	Sp1
evm.model.Chr09.15558	GC-motif
evm.model.Chr09.15558	O2-site
evm.model.Chr09.15558	CGTCA-motif
evm.model.Chr09.15558	CGTCA-motif
evm.model.Chr09.15558	CGTCA-motif
evm.model.Chr09.15558	CGTCA-motif
evm.model.Chr09.15558	ABRE
evm.model.Chr09.15558	ABRE
evm.model.Chr09.15558	G-Box
evm.model.Chr09.15558	G-box
evm.model.Chr09.15558	G-box
evm.model.Chr09.15558	TGA-element
evm.model.Chr09.15558	MBS
evm.model.Chr09.18506	TGA-element
evm.model.Chr09.18506	MBS
evm.model.Chr09.18506	G-box
evm.model.Chr09.18506	TCA
evm.model.Chr09.18506	TCA
evm.model.Chr09.18506	Box 4
evm.model.Chr09.18506	ARE
evm.model.Chr09.18506	CAT-box
evm.model.Chr09.18506	CAT-box
evm.model.Chr09.18506	Sp1
evm.model.Chr09.18506	Sp1
evm.model.Chr09.18506	Sp1
evm.model.Chr09.18506	GC-motif
evm.model.Chr09.18506	GC-motif
evm.model.Chr09.18506	TC-rich repeats
evm.model.Chr09.20602	G-Box
evm.model.Chr09.20602	GT1-motif
evm.model.Chr09.20602	GT1-motif
evm.model.Chr09.20602	GT1-motif
evm.model.Chr09.20602	GT1-motif
evm.model.Chr09.20602	GT1-motif
evm.model.Chr09.20602	ABRE
evm.model.Chr09.20602	ABRE
evm.model.Chr09.20602	ABRE
evm.model.Chr09.20602	ABRE
evm.model.Chr09.20602	MBS
evm.model.Chr09.20602	G-box
evm.model.Chr09.20602	G-box
evm.model.Chr09.20602	G-box
evm.model.Chr09.20602	CGTCA-motif
evm.model.Chr09.20602	CGTCA-motif
evm.model.Chr09.20602	CGTCA-motif
evm.model.Chr09.20602	CGTCA-motif
evm.model.Chr09.20602	O2-site
evm.model.Chr09.20602	ARE
evm.model.Chr09.21006	ABRE3a
evm.model.Chr09.21006	ARE
evm.model.Chr09.21006	CGTCA-motif
evm.model.Chr09.21006	GATA-motif
evm.model.Chr09.21006	TC-rich repeats
evm.model.Chr09.21006	Sp1
evm.model.Chr09.21006	Sp1
evm.model.Chr09.21006	CAT-box
evm.model.Chr09.21006	CAT-box
evm.model.Chr09.21006	G-box
evm.model.Chr09.21006	G-box
evm.model.Chr09.21006	G-box
evm.model.Chr09.21006	G-box
evm.model.Chr09.21006	ABRE4
evm.model.Chr09.21006	ABRE
evm.model.Chr09.21006	ABRE
evm.model.Chr09.21006	ABRE
evm.model.Chr09.21006	ABRE
evm.model.Chr09.21006	ABRE
evm.model.Chr09.21006	ABRE
evm.model.Chr09.21006	ABRE
evm.model.Chr09.21006	G-Box
evm.model.Chr09.21006	G-Box
evm.model.Chr09.21006	G-Box
evm.model.Chr09.21006	GT1-motif
evm.model.Chr09.21006	TCA
evm.model.Chr09.23497	G-Box
evm.model.Chr09.23497	G-Box
evm.model.Chr09.23497	GT1-motif
evm.model.Chr09.23497	ABRE
evm.model.Chr09.23497	ABRE
evm.model.Chr09.23497	ABRE
evm.model.Chr09.23497	P-box
evm.model.Chr09.23497	TGA-element
evm.model.Chr09.23497	G-box
evm.model.Chr09.23497	G-box
evm.model.Chr09.23497	G-box
evm.model.Chr09.23497	G-box
evm.model.Chr09.23497	Box 4
evm.model.Chr09.23497	CGTCA-motif
evm.model.Chr09.23497	CGTCA-motif
evm.model.Chr09.23497	CGTCA-motif
evm.model.Chr09.23497	CGTCA-motif
evm.model.Chr09.23497	O2-site
evm.model.Chr09.23497	ARE
evm.model.Chr09.4174	GATA-motif
evm.model.Chr09.4174	Box 4
[truncated: 1,089 more rows]

## Sheet: Supplementary table 5
List and detailed information of identified GRAS genes in Elymus sibiricus
Gene Name	Gene ID	Chr	CDS Length	Pep Length	Molecular Weight(kDa)	Theoretical pI	Instability Index	Aliphatic Index	Grand Average of Hydropathicity	Subcellular localization prediction
EsGRAS1	evm.model.Chr01.7082	1	1377	458	49656.7	5.38	36.95	93.14	0.09	Chloroplast
EsGRAS2	evm.model.Chr01.7190	1	1794	597	64089.6	5.58	63.19	64.37	-0.41	Nuclear
EsGRAS3	evm.model.Chr01.7423	1	1674	557	61462.4	5.84	47.64	77.59	-0.346	Chloroplast
EsGRAS4	evm.model.Chr01.7755	1	1311	436	47820.4	6.16	54.79	91.61	-0.191	Nuclear
EsGRAS5	evm.model.Chr01.8450	1	1713	570	64265.1	5.94	40.42	83.53	-0.435	Cytoplasmic
EsGRAS6	evm.model.Chr01.18120	1	1893	630	66501	6.29	51.54	85.48	-0.141	Nuclear
EsGRAS7	evm.model.Chr01.19209	1	1500	499	52711.9	5.48	37.98	80.9	-0.25	Nuclear
EsGRAS8	evm.model.Chr01.20585	1	1536	511	54059	6.41	51.76	84.36	-0.15	Nuclear
EsGRAS9	evm.model.Chr01.22082	1	1452	483	52884.7	6	40.54	98.28	-0.051	Mitochondrial
EsGRAS10	evm.model.Chr01.22106	1	1401	466	50724.5	6.28	43.39	95.41	0.059	Chloroplast
EsGRAS11	evm.model.Chr02.4465	2	2142	713	77164.1	6.03	60.66	78.53	-0.249	Nuclear
EsGRAS12	evm.model.Chr02.7906	2	1380	459	49652.7	5.44	38.36	92.09	0.089	Chloroplast
EsGRAS13	evm.model.Chr02.7979	2	1794	597	63939.5	5.58	62.44	64.05	-0.396	Nuclear
EsGRAS14	evm.model.Chr02.8105	2	1665	554	61260.4	5.97	47.65	78.72	-0.344	Chloroplast
EsGRAS15	evm.model.Chr02.8519	2	1311	436	47604.3	6.5	50.87	93.44	-0.167	Cytoplasmic
EsGRAS16	evm.model.Chr02.8983	2	1713	570	64363	5.98	40.78	82.33	-0.466	Cytoplasmic
EsGRAS17	evm.model.Chr02.17520	2	1251	416	45472.1	5.93	49.23	97.04	0.017	Cytoplasmic
EsGRAS18	evm.model.Chr02.19199	2	2145	714	75247.4	6.78	53.15	88.85	-0.059	Chloroplast
EsGRAS19	evm.model.Chr02.20403	2	1521	506	53973.1	6.93	55.35	83.85	-0.159	Nuclear
EsGRAS20	evm.model.Chr02.21979	2	1429	475	52511.3	6.07	42.9	99.31	-0.021	Cytoplasmic
EsGRAS21	evm.model.Chr02.21980	2	1113	370	41061.1	6.32	47.09	95.54	-0.142	Cytoplasmic
EsGRAS22	evm.model.Chr02.21995	2	1464	487	53347	5.66	44.69	91.48	-0.058	Cytoplasmic
EsGRAS23	evm.model.Chr02.21996	2	1464	487	53347	5.66	44.69	91.48	-0.058	Cytoplasmic
EsGRAS24	evm.model.Chr02.21999	2	1737	578	62525.3	6.19	46.18	85.19	-0.107	Mitochondrial
EsGRAS25	evm.model.Chr03.2227	3	2280	759	86455	8.33	46.12	74.22	-0.533	Nuclear
EsGRAS26	evm.model.Chr03.2230	3	1689	562	63805.3	5.97	48.01	81.25	-0.411	Cytoplasmic
EsGRAS27	evm.model.Chr03.2232	3	2373	790	89478.5	9.43	65.35	82.01	-0.519	Nuclear
EsGRAS28	evm.model.Chr03.11804	3	1866	621	65087	5.96	53.43	82.05	0.024	Cytoplasmic
EsGRAS29	evm.model.Chr03.14314	3	675	224	24328.4	7.76	41.66	105.8	0.39	Cytoplasmic
EsGRAS30	evm.model.Chr03.14850	3	1428	475	50325.1	5.87	46.97	85.31	0.049	Peroxisome
EsGRAS31	evm.model.Chr03.15332	3	1248	415	44525.6	6.03	48.51	87.25	-0.113	Cytoplasmic
EsGRAS32	evm.model.Chr03.17157	3	696	231	25171.9	6.23	40.18	88.31	0.096	Chloroplast
EsGRAS33	evm.model.Chr03.17158	3	943	313	32651.8	6.1	39.87	81.69	0.003	Chloroplast
EsGRAS34	evm.model.Chr03.18852	3	1461	486	51260.3	6.06	41.36	83.93	0.077	Nuclear
EsGRAS35	evm.model.Chr04.2319	4	2148	715	81129	7.3	48.75	79.44	-0.482	Nuclear
EsGRAS36	evm.model.Chr04.2320	4	2355	784	88747.4	8.74	51.09	82.9	-0.376	Nuclear
EsGRAS37	evm.model.Chr04.2324	4	1503	500	57455.4	9.4	51.31	82.74	-0.406	Cytoplasmic
EsGRAS38	evm.model.Chr04.11750	4	1863	620	64885.9	5.93	52.12	80.94	0.016	Nuclear
EsGRAS39	evm.model.Chr04.14998	4	1473	490	51989.9	5.94	48.47	82.49	-0.011	Peroxisome
EsGRAS40	evm.model.Chr04.15498	4	1239	412	44196.2	6.02	46.59	87.65	-0.102	Cytoplasmic
EsGRAS41	evm.model.Chr04.19365	4	1479	492	51927.2	5.62	42.37	85.87	0.121	Nuclear
EsGRAS42	evm.model.Chr05.11883	5	1500	502	52942.5	5.16	45.91	82.21	-0.007	Nuclear
EsGRAS43	evm.model.Chr05.21261	5	2175	724	81837.6	8.92	46.24	83.77	-0.449	Nuclear
EsGRAS44	evm.model.Chr05.21264	5	1584	527	60440.3	5.38	42.12	76.57	-0.555	Nuclear
EsGRAS45	evm.model.Chr05.2854	5	1353	450	48994.7	6.22	53.11	90.84	-0.122	Nuclear
EsGRAS46	evm.model.Chr05.5649	5	1659	552	61424.1	4.75	39.69	78.17	-0.286	Nuclear
EsGRAS47	evm.model.Chr05.6228	5	1551	516	56257.8	5.62	45.15	79.5	-0.179	Cytoplasmic
EsGRAS48	evm.model.Chr05.6232	5	1551	516	55965.6	5.89	42.67	84.22	-0.123	Cytoplasmic
EsGRAS49	evm.model.Chr05.7172.2	5	2688	895	97685.5	6.01	51.46	77.37	-0.342	Nuclear
EsGRAS50	evm.model.Chr06.1025	6	1440	479	54062.7	6.56	37.5	82.92	-0.432	Cytoplasmic
EsGRAS51	evm.model.Chr06.3708	6	1590	529	57699.8	6.45	52.19	90.4	-0.134	Chloroplast
EsGRAS52	evm.model.Chr06.6611	6	1659	552	61335.9	4.75	38.69	77.81	-0.278	Nuclear
EsGRAS53	evm.model.Chr06.7185	6	1551	516	56200.9	5.7	47.19	81.76	-0.13	Nuclear
EsGRAS54	evm.model.Chr06.7186	6	1548	515	55930.5	5.9	42.85	83.05	-0.15	Cytoplasmic
EsGRAS55	evm.model.Chr06.8224	6	2445	814	89266.9	5.63	50.15	76.66	-0.322	Nuclear
EsGRAS56	evm.model.Chr06.20965	6	1848	616	69787.5	8.42	47.23	80.1	-0.494	Nuclear
EsGRAS57	evm.model.Chr06.20966	6	1497	498	57418.3	5.81	38.2	86.85	-0.524	Cytoplasmic
EsGRAS58	evm.model.Chr06.20967	6	2124	707	80343.4	7.23	42.91	83.03	-0.44	Nuclear
EsGRAS59	evm.model.Chr07.301	7	492	163	17775.6	5.71	59.82	101.23	-0.091	Extracellular
EsGRAS60	evm.model.Chr07.302	7	840	279	31555.9	6.51	38.73	90.82	-0.162	cytoskeleton
EsGRAS61	evm.model.Chr07.310	7	864	287	31435.2	5.08	54.96	78.22	-0.424	Cytoplasmic
EsGRAS62	evm.model.Chr07.792	7	1629	542	57453	5.83	71.21	81.66	-0.19	Chloroplast
EsGRAS63	evm.model.Chr07.2436	7	1866	621	65669.6	6.23	49.29	74.35	-0.253	Chloroplast
EsGRAS64	evm.model.Chr07.6241	7	2226	741	81381.5	5.05	41.97	72.75	-0.417	Chloroplast
EsGRAS65	evm.model.Chr07.17266	7	1281	426	45104.1	6.51	45.11	92.28	-0.01	Nuclear
EsGRAS66	evm.model.Chr08.538	8	768	255	28993.1	6.54	47.96	91.02	-0.303	Cytoplasmic
EsGRAS67	evm.model.Chr08.539	8	315	104	12075	7.83	30.9	88.08	-0.298	Cytoplasmic
EsGRAS68	evm.model.Chr08.797	8	1626	541	56840.4	5.97	64.64	83.84	-0.092	Chloroplast
EsGRAS69	evm.model.Chr08.2682	8	1872	623	65848.9	6.16	45.14	74.43	-0.218	Chloroplast
EsGRAS70	evm.model.Chr08.6673	8	2202	733	80848.9	5.08	43.98	73.41	-0.43	Chloroplast
EsGRAS71	evm.model.Chr08.16445	8	1281	426	45121.1	6.93	45.18	92.51	-0.02	Nuclear
EsGRAS72	evm.model.Chr09.687	9	1842	613	68589.9	6.84	33.9	78.94	-0.438	Cytoplasmic
EsGRAS73	evm.model.Chr09.4174	9	2235	744	81957.4	5.37	50.29	78.17	-0.413	Cytoplasmic
EsGRAS74	evm.model.Chr09.7976	9	1688	555	61090.3	7.34	54.21	80.13	-0.286	Mitochondrial
EsGRAS75	evm.model.Chr09.8244	9	2331	776	87199.6	6.76	50.86	79.43	-0.471	Nuclear
EsGRAS76	evm.model.Chr09.8603	9	1944	647	69098.5	6.09	57.06	89	-0.128	Chloroplast
EsGRAS77	evm.model.Chr09.15553	9	2619	872	99598.5	9.21	48.73	68.76	-0.8	Cytoplasmic
EsGRAS78	evm.model.Chr09.15558	9	2154	717	80081.8	6.03	40.4	100.54	-0.04	Cytoplasmic
EsGRAS79	evm.model.Chr09.18506	9	1653	550	61014.8	5.78	48.64	83	-0.267	Nuclear
EsGRAS80	evm.model.Chr09.20602	9	762	253	26684.7	8.81	54.37	86.48	0.15	Cytoplasmic
EsGRAS81	evm.model.Chr09.21006	9	2238	745	83316.4	8.06	55.23	74.16	-0.496	Nuclear
EsGRAS82	evm.model.Chr09.23497	9	1938	645	72684.2	6.21	52.11	78.82	-0.325	Cytoplasmic
EsGRAS83	evm.model.Chr10.4059	10	2232	743	81921.3	5.26	51.54	78.02	-0.431	Cytoplasmic
EsGRAS84	evm.model.Chr10.8058	10	1533	510	55925.3	6.75	53.32	81.47	-0.255	Nuclear
EsGRAS85	evm.model.Chr10.8198	10	2332	777	87100.6	7.06	52.21	78.58	-0.478	Nuclear
EsGRAS86	evm.model.Chr10.8413	10	1947	648	69326.7	6.12	56.99	88.84	-0.144	Chloroplast
EsGRAS87	evm.model.Chr10.15554	10	3745	1247	140280	7.85	43.14	94.6	-0.178	Nuclear
EsGRAS88	evm.model.Chr10.15580	10	4374	1457	163397	6.91	41.48	96.62	-0.091	Cytoplasmic
EsGRAS89	evm.model.Chr10.18541	10	1650	549	60790.7	5.75	48.66	84.23	-0.253	Nuclear
EsGRAS90	evm.model.Chr10.21058	10	1938	645	71993.5	6.03	53.78	77.33	-0.359	Nuclear
EsGRAS91	evm.model.Chr11.13918	11	2124	707	73958.9	5.96	48.86	85.19	-0.023	Nuclear
EsGRAS92	evm.model.Chr11.7841	11	1188	395	41432.9	5.45	48.85	91.16	0.026	Cytoplasmic
EsGRAS93	evm.model.Chr12.7936	12	1194	397	41756.2	5.51	47.25	89.72	0.003	Cytoplasmic
EsGRAS94	evm.model.Chr12.14920	12	1689	562	59783.1	5.13	43.47	76.09	-0.153	Nuclear
EsGRAS95	evm.model.Chr12.17171	12	1590	529	58652.9	5.76	51.21	79.85	-0.275	Nuclear
EsGRAS96	evm.model.Chr12.20835	12	1902	633	67251.3	6.03	50.67	85.85	-0.105	Chloroplast
EsGRAS97	evm.model.Chr12.20909	12	3210	1069	119747	5.69	50.83	70.16	-0.53	Nuclear
EsGRAS98	evm.model.Chr13.1397	13	1954	617	64950.9	5	51.31	78.4	-0.151	Nuclear
EsGRAS99	evm.model.Chr13.1772	13	1662	553	59140.8	4.91	51.88	84.07	-0.034	Chloroplast
EsGRAS100	evm.model.Chr13.4018	13	1422	473	52081	5	42.84	89.51	-0.002	Nuclear
EsGRAS101	evm.model.Chr13.4444	13	2034	677	72099.7	5.94	58.15	89.76	-0.149	Nuclear
EsGRAS102	evm.model.Chr13.4664	13	1386	461	51965	6.85	49.29	95.66	-0.144	Cytoplasmic
EsGRAS103	evm.model.Chr13.5327	13	2433	810	89069.2	5.94	41.1	71	-0.411	Peroxisome
EsGRAS104	evm.model.Chr13.5332	13	2034	677	74745.8	6.44	53.93	81.33	-0.399	Nuclear
EsGRAS105	evm.model.Chr13.5347	13	2022	673	75059.2	5.64	49.74	82.67	-0.375	Cytoplasmic
EsGRAS106	evm.model.Chr13.5348	13	1794	597	67243.4	5.98	41.45	79.43	-0.34	Cytoplasmic
EsGRAS107	evm.model.Chr13.5349	13	1764	587	66531.6	5.92	39.33	81.62	-0.379	Chloroplast
EsGRAS108	evm.model.Chr13.5350	13	1908	635	71239	5.25	38.95	81.28	-0.355	Cytoplasmic
EsGRAS109	evm.model.Chr13.5351	13	1938	645	72219.3	6.13	41.1	83.21	-0.307	Endoplasmic reticulum
EsGRAS110	evm.model.Chr13.5363	13	1935	644	72383.7	6.15	50.29	79.44	-0.345	Cytoplasmic
EsGRAS111	evm.model.Chr13.5364	13	1791	596	67695.1	6.61	44.43	78.56	-0.38	Cytoplasmic
EsGRAS112	evm.model.Chr13.11647	13	2094	697	73337.3	5.96	46.54	86.96	-0.02	Nuclear
EsGRAS113	evm.model.Chr14.2718	14	1857	618	64996	5.06	49.81	79.05	-0.13	Nuclear
EsGRAS114	evm.model.Chr14.3195	14	1650	549	59034.8	4.88	53.8	84.99	-0.032	Chloroplast
EsGRAS115	evm.model.Chr14.5637	14	1356	451	49493	5.07	44.52	89.76	-0.044	Cytoplasmic
EsGRAS116	evm.model.Chr14.6237	14	2043	680	72317.9	5.97	58.87	89.66	-0.165	Nuclear
EsGRAS117	evm.model.Chr14.6412	14	1341	446	50159.7	6.32	48.85	92.98	-0.18	Cytoplasmic
EsGRAS118	evm.model.Chr14.6748	14	1791	596	67580	6.73	43.74	80.37	-0.34	Cytoplasmic
EsGRAS119	evm.model.Chr14.6749	14	1935	644	72265.5	6.21	48.81	80.33	-0.323	Nuclear
EsGRAS120	evm.model.Chr14.6760	14	1950	649	73000.1	5.79	45.06	82.54	-0.319	Cytoplasmic
EsGRAS121	evm.model.Chr14.6761	14	1059	352	40175.2	8.47	43.5	81.73	-0.232	Chloroplast
EsGRAS122	evm.model.Chr14.6762	14	1770	589	66718.6	6.05	37.41	81.04	-0.408	Chloroplast
EsGRAS123	evm.model.Chr14.6763	14	1767	588	66323.4	5.63	41.52	79.47	-0.332	Cytoplasmic
EsGRAS124	evm.model.Chr14.6764	14	1740	579	63438.2	5.82	55.25	80.45	-0.28	Nuclear
EsGRAS125	evm.model.Chr14.6765	14	2019	672	74731.7	6.2	53.68	80.89	-0.421	Cytoplasmic
EsGRAS126	evm.model.Chr14.6766	14	2445	814	89284.5	5.97	39.52	70.76	-0.405	Peroxisome
EsGRAS127	evm.model.Chr14.13211	14	1686	561	59870.2	5.23	42.88	76.06	-0.175	Nuclear
EsGRAS128	evm.model.Chr14.15240	14	1611	536	59488.8	6.02	50.4	78.82	-0.326	Nuclear
EsGRAS129	evm.model.Chr14.17606	14	1932	643	71926.8	5.5	46.77	82.1	-0.276	Cytoplasmic
EsGRAS130	evm.model.Chr14.18646	14	1917	638	67437.6	5.98	51	87.19	-0.082	Cytoplasmic
